# Supplementary material
Source: publisher figshare collection journal article supplement (https://acs.figshare.com/ndownloader/files/25927049)
Supplement: Supplementary file 1 [file 25927049]

# Supporting Information

## **The Effectiveness and Mechanism of Ene(amido) Group in Activating Iron for Catalytic Asymmetric Transfer Hydrogenation of Ketones**

*Qingquan Xue<sup>⊥</sup>, Rongliang Wu<sup>⊥</sup>, Di Wang, Meifang Zhu\*, Weiwei Zuo\**

*State Key Laboratory for Modification of Chemical Fibers and Polymer Materials,  
College of Materials Science and Engineering, Donghua University, Shanghai 201620,  
P. R. China.*

\*E-mail: [zhumf@dhu.edu.cn](mailto:zhumf@dhu.edu.cn), [zuoweimei@dhu.edu.cn](mailto:zuoweimei@dhu.edu.cn)

**1. Scheme for the syntheses of the new tridentate (*R, R*)-P-NH-NH<sub>2</sub> ligand**

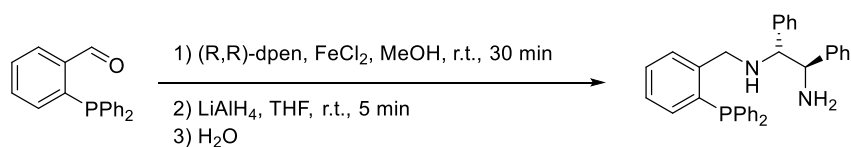

**Figure S1** Scheme of synthesis of *N*<sup>1</sup>-[2-(diphenylphosphino)phenyl]methyl]-1,2-diphenyl-(1*R*,2*R*)-1,2-ethanediamine

**2. The setup for the synthesis of 1-(diphenylphosphino)-propanone.**

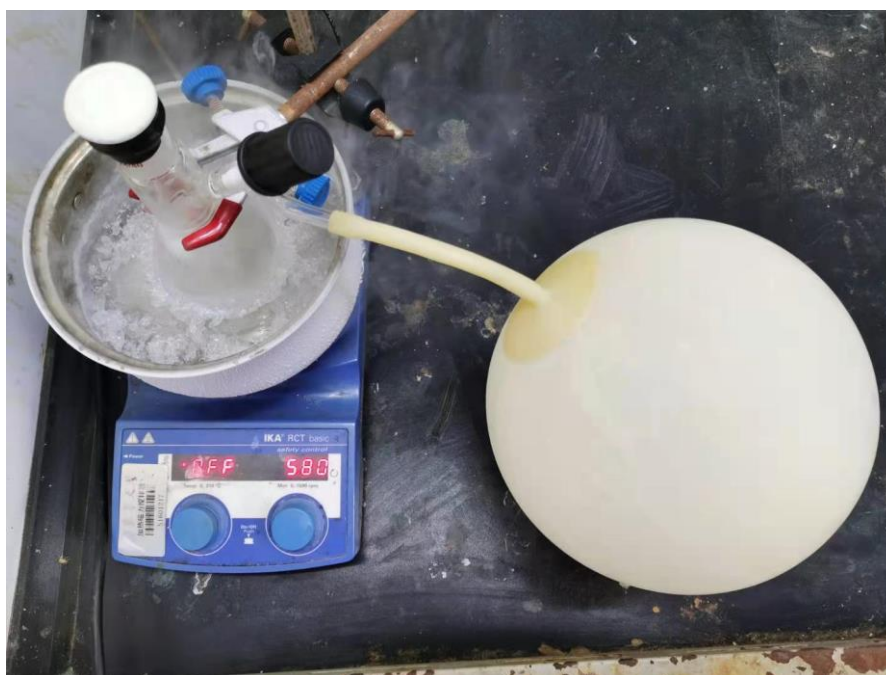

**Figure S2** The setup for the synthesis of 1-(diphenylphosphino)-propanone.

### 3. The FTIR spectra of 1b and 2a

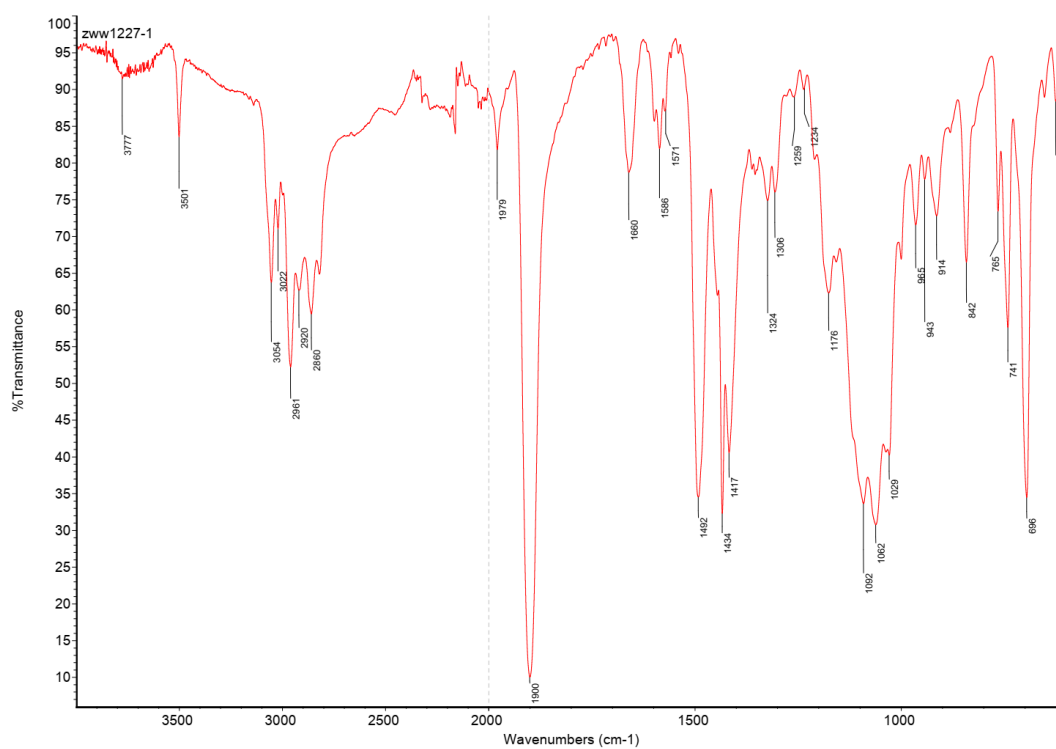

Figure S3 The FTIR spectrum of 1b.

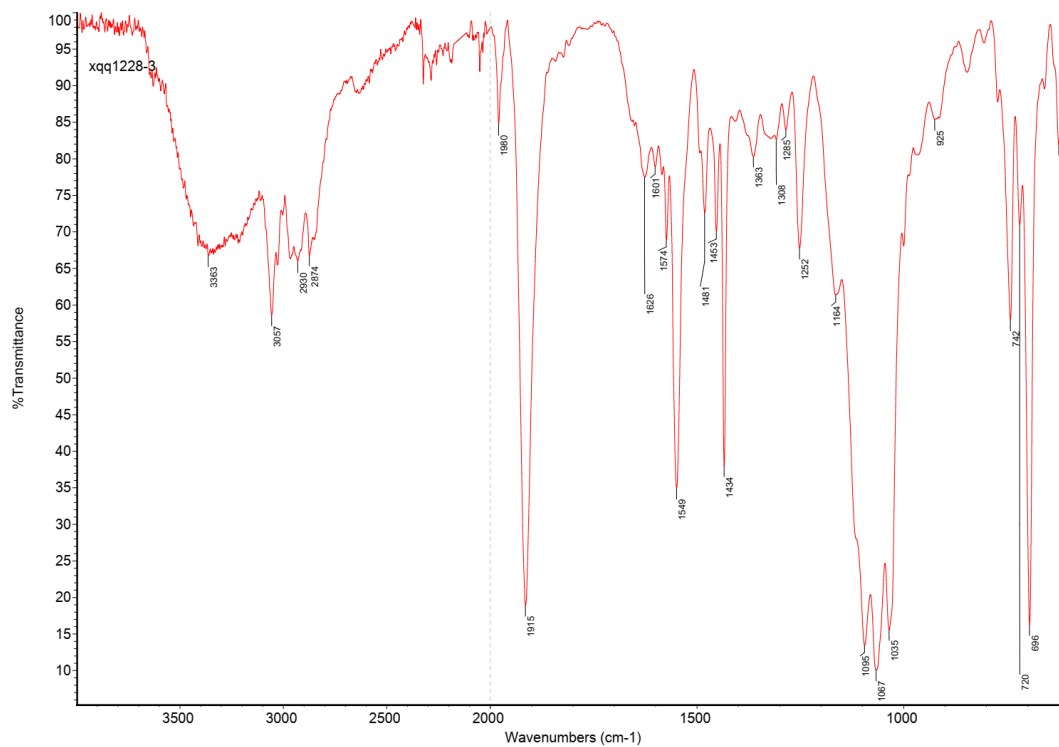

Figure S4 The FTIR spectrum of 2a.

#### 4. The $^1\text{H}$ NMR chemical shifts of **1a**

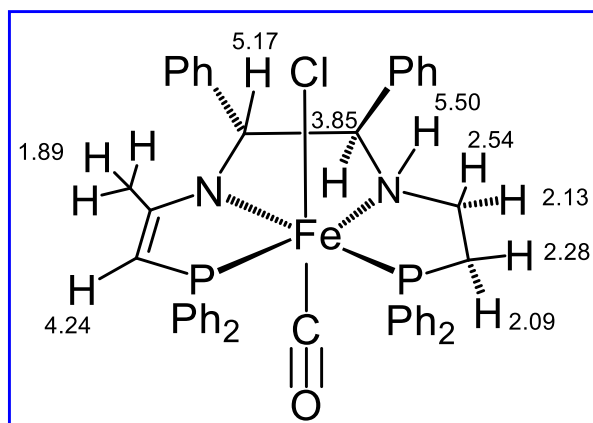

**Figure S5**  $^1\text{H}$  NMR chemical shifts of **1a**

## 5. Qualitative molecular orbital diagrams of 1b

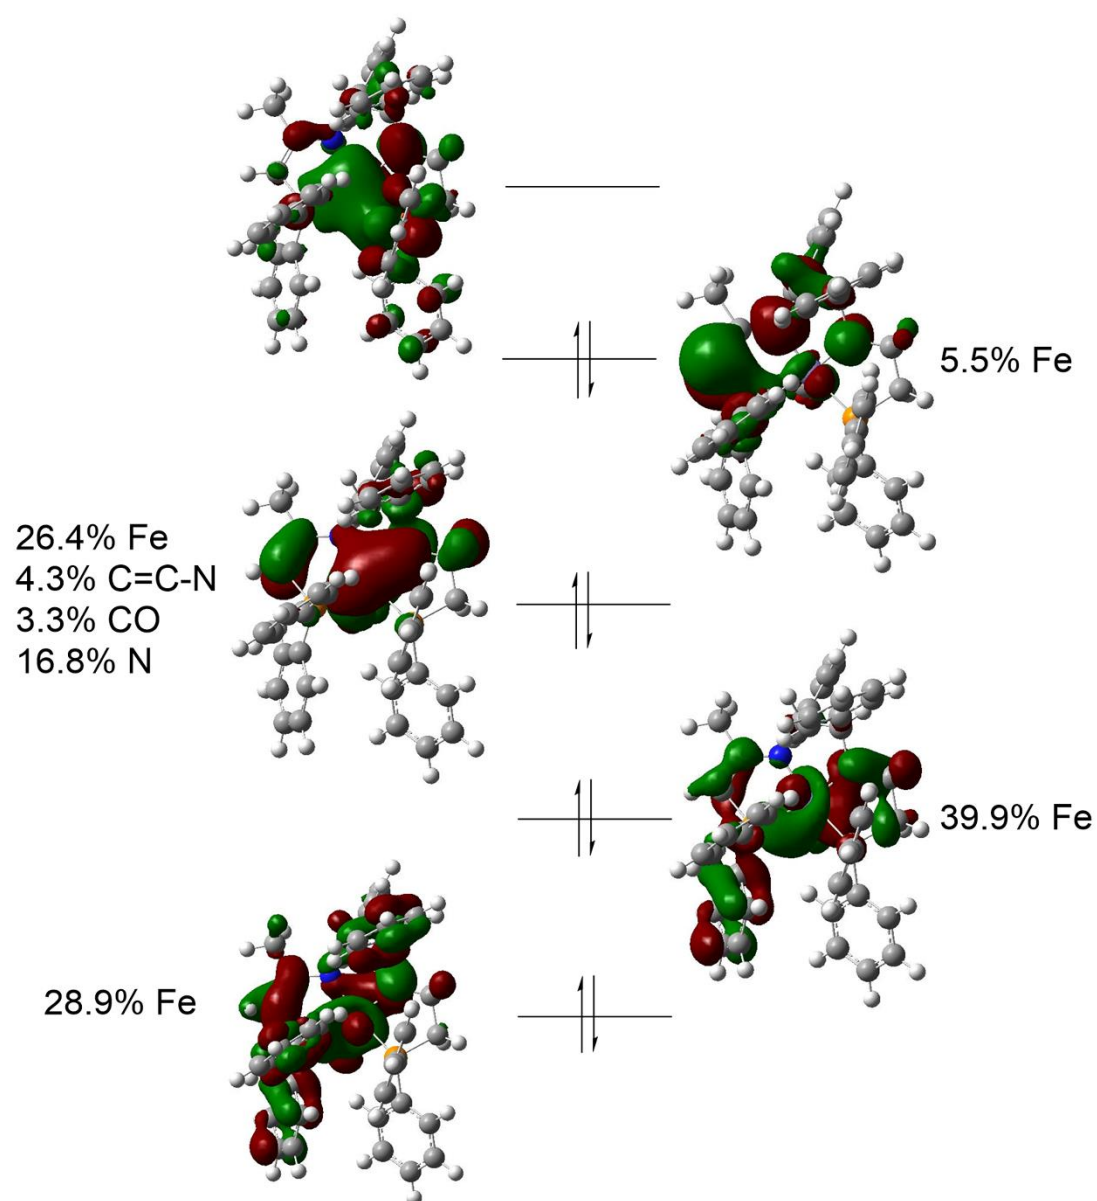

**Figure S6** Qualitative molecular orbital diagrams of **1b**

**Table S1.** Crystal data and Structure refinement for complexes **1** and **3**

| Compound reference                             | <b>1</b>                                                                           | <b>3</b>                                                                           |
|------------------------------------------------|------------------------------------------------------------------------------------|------------------------------------------------------------------------------------|
| Empirical formula                              | C <sub>44</sub> H <sub>42</sub> BClF <sub>4</sub> FeN <sub>2</sub> OP <sub>2</sub> | C <sub>43</sub> H <sub>38</sub> BClF <sub>5</sub> FeN <sub>2</sub> OP <sub>2</sub> |
| Formula weight                                 | 854.84                                                                             | 857.80                                                                             |
| Temperature/K                                  | 296 (2)                                                                            | 173 (2)                                                                            |
| Crystal system                                 | monoclinic                                                                         | Orthorhombic                                                                       |
| Space group                                    | P 21                                                                               | P 21 21 2                                                                          |
| a/Å                                            | 14.0962(9)                                                                         | 19.6543(3)                                                                         |
| b/Å                                            | 10.1694(6)                                                                         | 23.2544(7)                                                                         |
| c/Å                                            | 14.1863(8)                                                                         | 18.1244(5)                                                                         |
| $\alpha/^\circ$                                | 90                                                                                 | 90                                                                                 |
| $\beta/^\circ$                                 | 93.626(2)                                                                          | 90                                                                                 |
| $\gamma/^\circ$                                | 90                                                                                 | 90                                                                                 |
| Volume/Å <sup>3</sup>                          | 2029.5(2)                                                                          | 8283.7(4)                                                                          |
| Z                                              | 2                                                                                  | 8                                                                                  |
| $\rho_{\text{calc}}/\text{cm}^3$               | 1.399                                                                              | 1.376                                                                              |
| $\mu/\text{mm}^{-1}$                           | 0.572                                                                              | 0.564                                                                              |
| F (000)                                        | 884                                                                                | 3528                                                                               |
| Crystal size/mm <sup>3</sup>                   | 0.16 × 0.13 × 0.1                                                                  | 0.170 x 0.140 x 0.060                                                              |
| Radiation                                      | MoK $\alpha$ ( $\lambda$ = 0.71073)                                                | MoK $\alpha$ ( $\lambda$ = 0.71073)                                                |
| 2 $\Theta$ range for data collection/ $^\circ$ | 2.466 to 25.998                                                                    | 1.424 to 25.497                                                                    |
| Index ranges                                   | -17 ≤ h ≤ 17, -12 ≤ k ≤ 12, -17 ≤ l ≤ 17                                           | -23 ≤ h ≤ 18, -28 ≤ k ≤ 28, -21 ≤ l ≤ 21                                           |
| Reflections collected                          | 38726                                                                              | 40369                                                                              |
| Independent reflections                        | 7986 [R <sub>int</sub> = 0.0437]                                                   | 15154 [R <sub>int</sub> = 0.0559]                                                  |
| Data/restraints/parameters                     | 7986/1/511                                                                         | 15154/81/1021                                                                      |
| Goodness-of-fit on F <sup>2</sup>              | 1.050                                                                              | 1.021                                                                              |
| Final R indexes [I ≥ 2 $\sigma$ (I)]           | R <sub>1</sub> = 0.038, wR <sub>2</sub> = 0.0918                                   | R <sub>1</sub> = 0.0602, wR <sub>2</sub> = 0.1534                                  |
| Final R indexes [all data]                     | R <sub>1</sub> = 0.0433, wR <sub>2</sub> = 0.0966                                  | R <sub>1</sub> = 0.0739, wR <sub>2</sub> = 0.1649                                  |
| Largest diff. peak/hole / e Å <sup>-3</sup>    | 0.387/-0.294                                                                       | 0.795/-0.507                                                                       |

## 6. General procedure for ATH:

The quantity of the precatalyst was measured via a stock solution method. A concentrated stock solution was made by dissolving the precatalysts ( $1.97 \times 10^{-2}$  mmol) in 6.08 g cold dichloromethane. After all the solid was dissolved, the solution was immediately sucked into a syringe. The solution was then divided into equal portions into several 20 mL vials such that each portion has 0.2 g of the stock solution, and then dichloromethane was removed under vacuum. These operations led to a precatalyst quantity of  $6.48 \times 10^{-4}$  mmol in each vial. The base was prepared by dissolving KO<sup>t</sup>Bu (10 mg, 0.089 mmol) in <sup>i</sup>PrOH (1.02 g, 1.30 mL). <sup>i</sup>PrOH (6.63 g, 8.44 mL), substrate (3.95 mmol) and a clean stirring bar were added to the vial that contains the precatalyst and the solution was stirred for 5 minutes, or until it was dissolved. 0.015 g of the base stock solution was added into a vial that contains 0.546 g of <sup>i</sup>PrOH and the mixed solution was then added into the catalyst solution to start the catalytic reaction. 0.1 mL samples were taken via syringe and injected into Teflon-sealed GC vials prepared with wet, aerated <sup>i</sup>PrOH to quench catalysis.

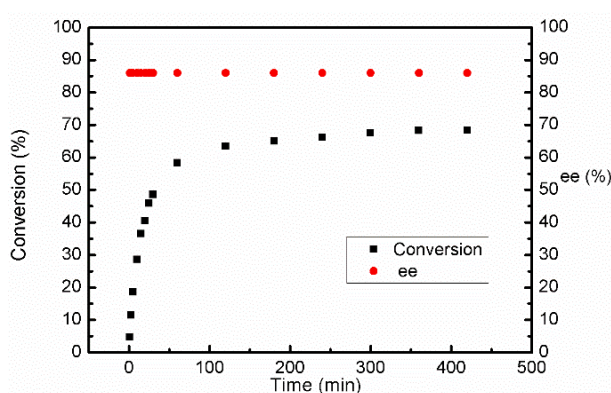

**Figure S7** Reaction profile and ee of catalytic reduction of acetophenone using complex **1**. Reaction conditions: [**1**] =  $6.73 \times 10^{-5}$  M, [KO<sup>t</sup>Bu] =  $5.45 \times 10^{-4}$  M, [substrate] = 0.412 M, [<sup>i</sup>PrOH] = 12.4 M, 28°C.

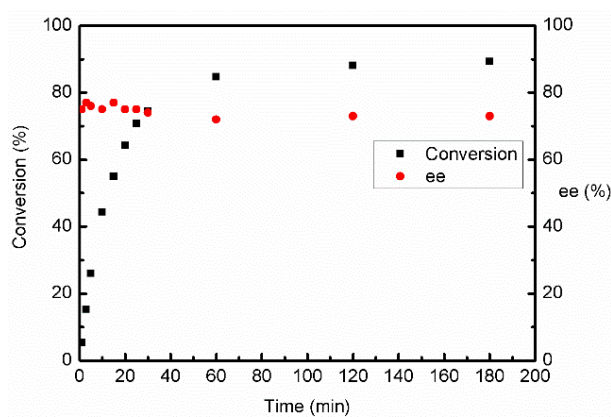

**Figure S8** Reaction profile and ee of catalytic reduction of acetophenone using complex **2**. Reaction conditions: [**2**] =  $6.73 \times 10^{-5}$  M, [KO<sup>t</sup>Bu] =  $5.45 \times 10^{-4}$  M, [substrate] = 0.412 M, [<sup>i</sup>PrOH] = 12.4 M, 28°C.

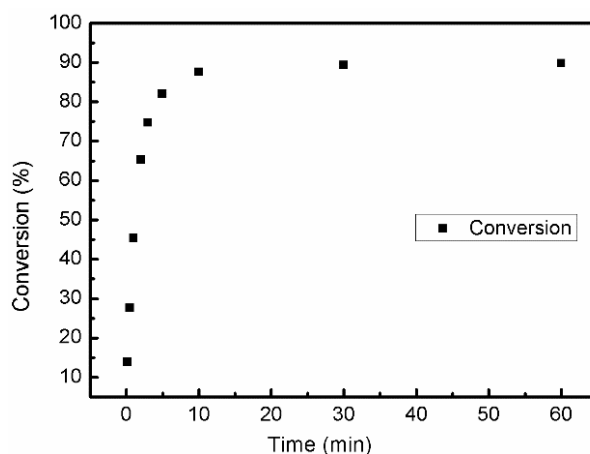

**Figure S9** Reaction profile and ee of catalytic reduction of acetophenone using complex **4**. Reaction conditions:  $[4] = 6.73 \times 10^{-5}$  M,  $[KO^tBu] = 5.45 \times 10^{-4}$  M,  $[substrate] = 0.412$  M,  $[iPrOH] = 12.4$  M,  $28^\circ\text{C}$ .

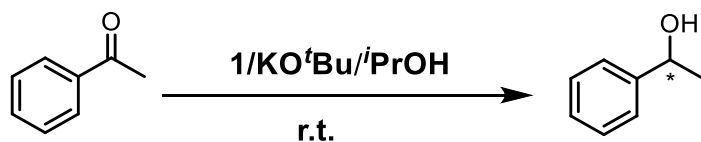

**Figure S10** Gas chromatographs. Reaction conditions:  $[Cat] = 6.73 \times 10^{-5}$  M,  $[KO^tBu] = 5.45 \times 10^{-4}$  M,  $[substrate] = 0.412$  M,  $[iPrOH] = 12.4$  M,  $28^\circ\text{C}$ . GC analysis conditions: Oven temperature ( $130^\circ\text{C}$ ). Retention time: product minor isomer = 7.2 min, product major isomer (*S*) = 7.5 min, starting material = 4.7 min.

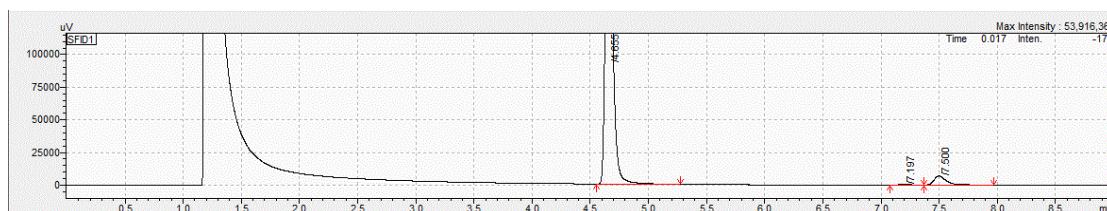

**Figure S10.1** 1 minute 4.7 % conversion 86% ee

The analysis result is as follow:

| Peaks number | Retention time | Area    | Height of peaks | Mark | Name of compounds | Area percentage |
|--------------|----------------|---------|-----------------|------|-------------------|-----------------|
| 1            | 4.655          | 1147946 | 275023          |      |                   | 95.289          |
| 2            | 7.197          | 4002    | 599             |      |                   | 0.332           |
| 3            | 7.500          | 52753   | 6839            |      |                   | 4.379           |
| Total        |                | 1204702 | 282461          |      |                   | 100.000         |



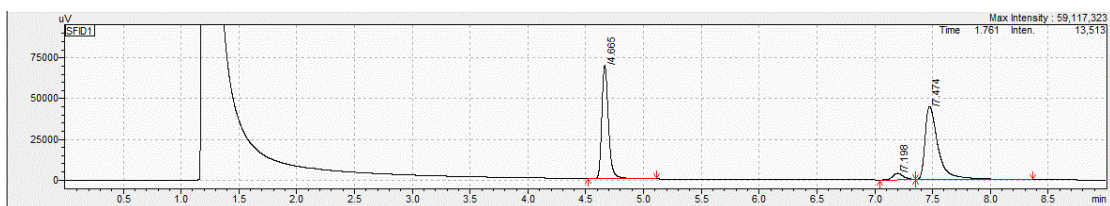

**Figure S10.2 60 minutes 58.3 % conversion 86% ee**

The analysis result is as follow:

| Peaks number | Retention time | Area   | Height of peaks | Mark | Name of compounds | Area percentage |
|--------------|----------------|--------|-----------------|------|-------------------|-----------------|
| 1            | 4.665          | 279760 | 69712           |      |                   | 41.694          |
| 2            | 7.198          | 27163  | 4061            |      |                   | 4.048           |
| 3            | 7.474          | 364068 | 45079           |      |                   | 54.258          |
| Total        |                | 670991 | 118852          |      |                   | 100.000         |

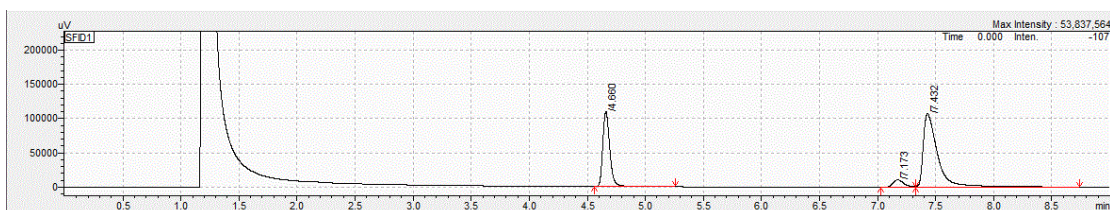

**Figure S10.3 420 minutes 68.3 % conversion 86% ee**

The analysis result is as follow:

| Peaks number | Retention time | Area    | Height of peaks | Mark | Name of compounds | Area percentage |
|--------------|----------------|---------|-----------------|------|-------------------|-----------------|
| 1            | 4.660          | 459701  | 109098          |      |                   | 31.681          |
| 2            | 7.173          | 68314   | 10698           |      |                   | 4.708           |
| 3            | 7.432          | 922996  | 107537          |      |                   | 63.611          |
| Total        |                | 1451010 | 227332          |      |                   | 100.000         |

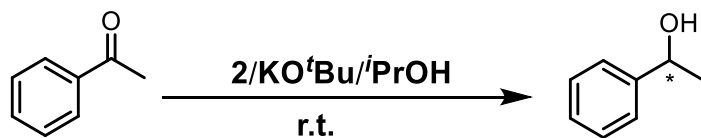

**Figure S11 Gas chromatographs.** Reaction conditions: [Cat] =  $6.73 \times 10^{-5}$  M, [KO<sup>t</sup>Bu] =  $5.45 \times 10^{-4}$  M, [substrate] = 0.412 M, [<sup>i</sup>PrOH] = 12.4 M, 28 °C. GC analysis conditions: Oven temperature (130 °C). Retention time: product minor isomer = 7.2 min, product major isomer (*S*) = 7.5 min, starting material = 4.7 min.

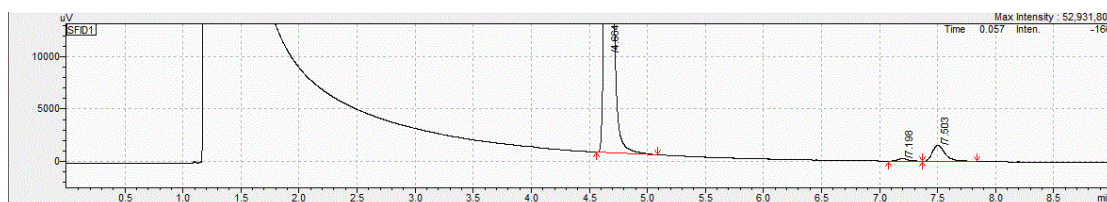

**Figure S11.1 1 minute 5.4% conversion 75% ee**

The analysis result is as follow:

| Peaks number | Retention time | Area   | Height of peaks | Mark | Name of compounds | Area percentage |
|--------------|----------------|--------|-----------------|------|-------------------|-----------------|
| 1            | 4.664          | 237960 | 55895           |      |                   | 94.605          |
| 2            | 7.198          | 1618   | 229             |      |                   | 0.643           |
| 3            | 7.503          | 11952  | 1558            |      |                   | 4.752           |
| Total        |                | 251530 | 57682           |      |                   | 100.000         |

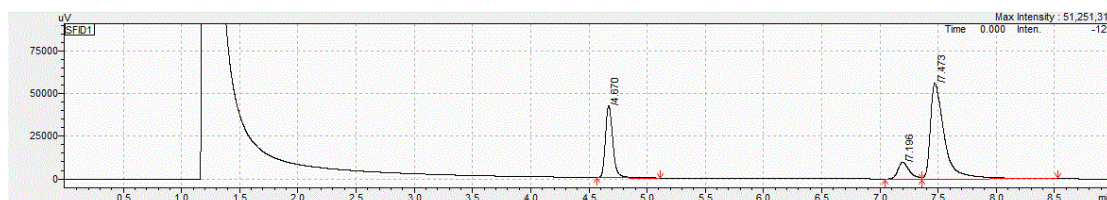

**Figure S11.2 30 minutes 74.4 % conversion 74% ee**

The analysis result is as follow:

| Peaks number | Retention time | Area   | Height of peaks | Mark | Name of compounds | Area percentage |
|--------------|----------------|--------|-----------------|------|-------------------|-----------------|
| 1            | 4.670          | 186078 | 42247           |      |                   | 25.583          |
| 2            | 7.196          | 66819  | 9973            |      |                   | 9.187           |
| 3            | 7.473          | 474462 | 56072           |      |                   | 65.231          |
| Total        |                | 727359 | 108291          |      |                   | 100.000         |

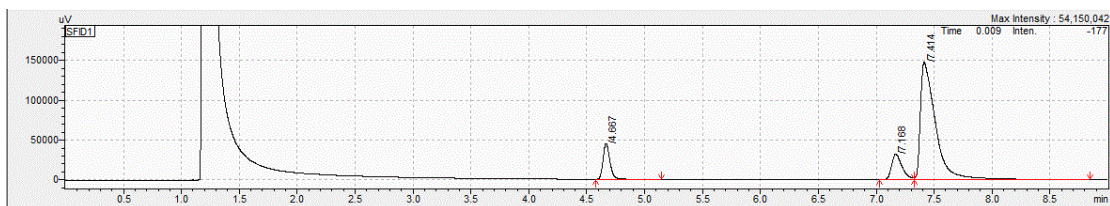

**Figure S11.3 180 minutes 89.3 % conversion 73% ee**

The analysis result is as follow:

| Peaks number | Retention time | Area    | Height of peaks | Mark | Name of compounds | Area percentage |
|--------------|----------------|---------|-----------------|------|-------------------|-----------------|
| 1            | 4.667          | 188444  | 44880           |      |                   | 10.733          |
| 2            | 7.168          | 205651  | 32380           |      |                   | 11.714          |
| 3            | 7.414          | 1361579 | 147716          |      |                   | 77.553          |
| Total        |                | 1755674 | 224976          |      |                   | 100.000         |

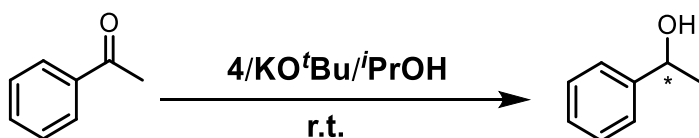

**Figure S12 Gas chromatographs.** Reaction conditions:  $[\text{Cat}] = 6.73 \times 10^{-5} \text{ M}$ ,  $[\text{KO}^t\text{Bu}] = 5.45 \times 10^{-4} \text{ M}$ ,  $[\text{substrate}] = 0.412 \text{ M}$ ,  $[\text{^iPrOH}] = 12.4 \text{ M}$ ,  $28^\circ\text{C}$ . GC analysis conditions: Oven temperature ( $130^\circ\text{C}$ ). Retention time: product isomer (*R*) = 7.2 min, product isomer (*S*) = 7.5 min, starting material = 4.7 min.

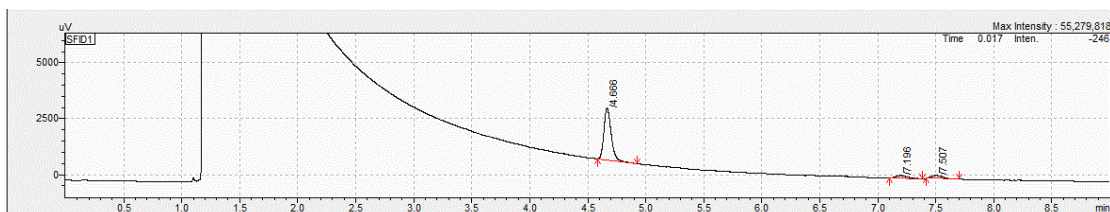

**Figure S12.1 10 seconds 13.9 % conversion**

The analysis result is as follow:

| Peaks number | Retention time | Area  | Height of peaks | Mark | Name of compounds | Area percentage |
|--------------|----------------|-------|-----------------|------|-------------------|-----------------|
| 1            | 4.666          | 10119 | 2318            |      |                   | 86.077          |
| 2            | 7.196          | 776   | 122             |      |                   | 6.599           |
| 3            | 7.507          | 861   | 140             |      |                   | 7.323           |
| Total        |                | 11756 | 2580            |      |                   | 100.000         |

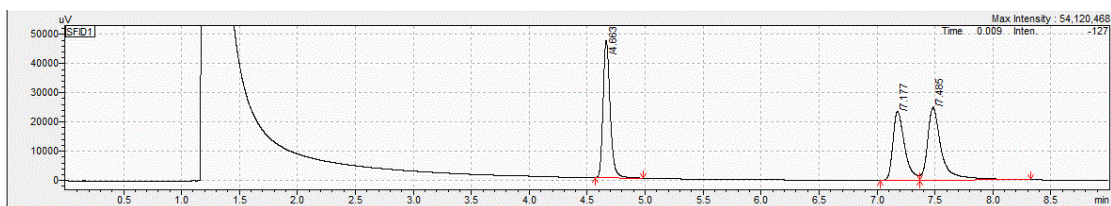

**Figure S12.2 2 minutes 65.3 % conversion**

The analysis result is as follow:

| Peaks number | Retention time | Area   | Height of peaks | Mark | Name of compounds | Area percentage |
|--------------|----------------|--------|-----------------|------|-------------------|-----------------|
| 1            | 4.663          | 199851 | 46694           |      |                   | 34.702          |
| 2            | 7.177          | 165279 | 23608           |      |                   | 28.699          |
| 3            | 7.485          | 210769 | 24954           |      |                   | 36.598          |
| Total        |                | 575898 | 95256           |      |                   | 100.000         |

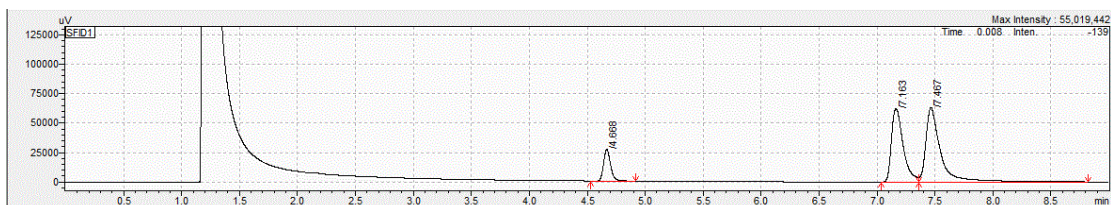

**Figure S12.3 60 minutes 89.8 % conversion**

The analysis result is as follow:

| Peaks number | Retention time | Area    | Height of peaks | Mark | Name of compounds | Area percentage |
|--------------|----------------|---------|-----------------|------|-------------------|-----------------|
| 1            | 4.668          | 113189  | 27022           |      |                   | 10.170          |
| 2            | 7.163          | 438963  | 62373           |      |                   | 39.442          |
| 3            | 7.467          | 560778  | 63280           |      |                   | 50.388          |
| Total        |                | 1112930 | 152675          |      |                   | 100.000         |



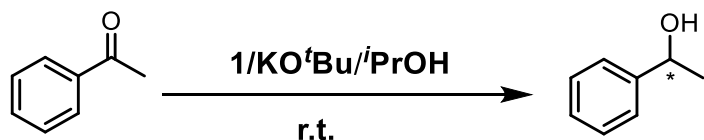

**Figure S13 Gas chromatograph.** Reaction conditions: [Cat] =  $6.48 \times 10^{-4}$  M, [KO<sup>t</sup>Bu] =  $5.24 \times 10^{-3}$  M, [substrate] = 0.397 M, [<sup>i</sup>PrOH] = 12.4 M, 28 °C. GC analysis conditions: Oven temperature (130 °C). Retention time: product minor isomer = 7.1 min, product major isomer (*S*) = 7.3 min, starting material = 4.6 min, 88 % conversion 80 % ee.

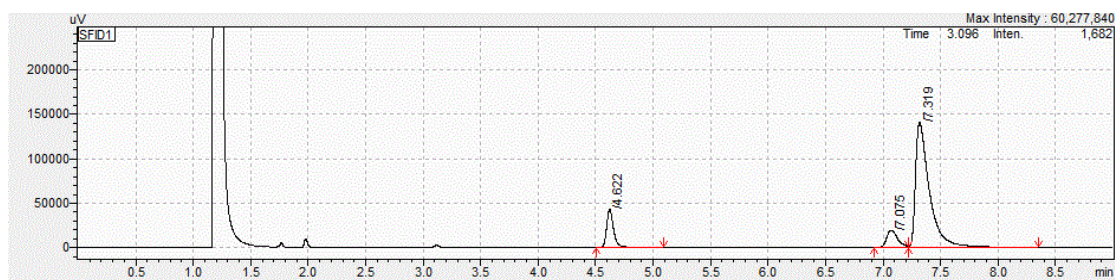

The analysis result is as follow:

| Peaks number | Retention time | Area    | Height of peaks | Mark | Name of compounds | Area percentage |
|--------------|----------------|---------|-----------------|------|-------------------|-----------------|
| 1            | 4.622          | 184191  | 43188           |      |                   | 12.194          |
| 2            | 7.075          | 130988  | 19670           |      |                   | 8.672           |
| 3            | 7.319          | 1195269 | 140916          |      |                   | 79.133          |
| Total        |                | 1510447 | 203774          |      |                   | 100.000         |

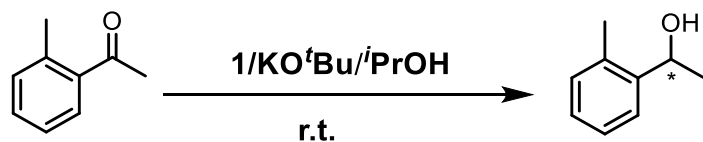

**Figure S14 Gas chromatograph.** Reaction conditions: [Cat] =  $6.48 \times 10^{-4}$  M, [KO<sup>t</sup>Bu] =  $5.24 \times 10^{-3}$  M, [substrate] = 0.397 M, [<sup>i</sup>PrOH] = 12.4 M, 28 °C. GC analysis conditions: Oven temperature (130 °C). Retention time: product minor isomer = 12.9 min, product major isomer (*S*) = 14.6 min, starting material = 5.6 min, 75 % conversion 98 % ee.

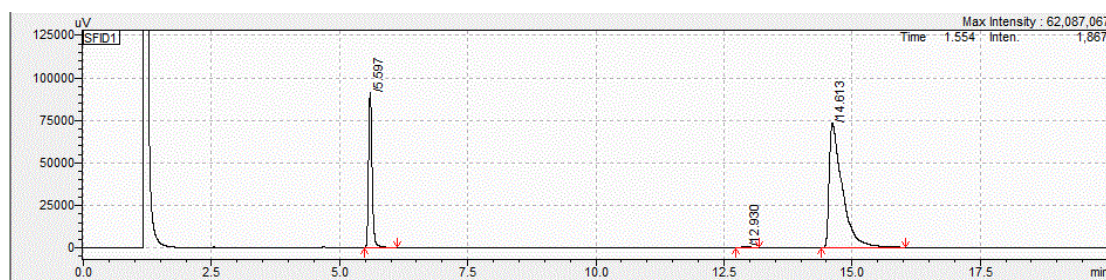

The analysis result is as follow:

| Peaks number | Retention time | Area    | Height of peaks | Mark | Name of compounds | Area percentage |
|--------------|----------------|---------|-----------------|------|-------------------|-----------------|
| 1            | 5.597          | 445293  | 91362           |      |                   | 25.298          |
| 2            | 12.930         | 10175   | 853             |      |                   | 0.578           |
| 3            | 14.613         | 1304717 | 73510           |      |                   | 74.124          |
| Total        |                | 1760185 | 165724          |      |                   | 100.000         |

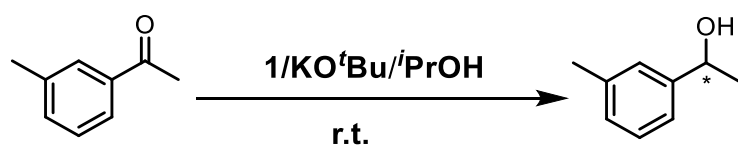

**Figure S15 Gas chromatograph.** Reaction conditions: [Cat] =  $6.48 \times 10^{-4}$  M, [KO<sup>t</sup>Bu] =  $5.24 \times 10^{-3}$  M, [substrate] = 0.397 M, [<sup>i</sup>PrOH] = 12.4 M, 28 °C. GC analysis conditions: Oven temperature (110 °C). Retention time: product minor isomer = 30.1 min, product major isomer (*S*) = 31.9 min, starting material = 14.7 min, 81 % conversion 87 % ee.

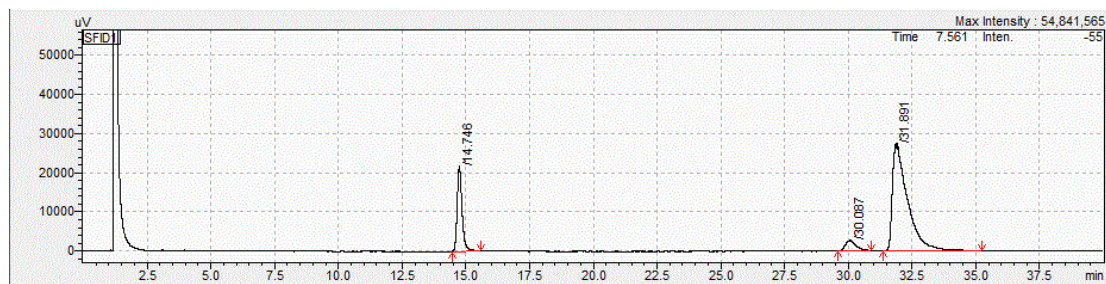

The analysis result is as follow:

| Peaks number | Retention time | Area    | Height of peaks | Mark | Name of compounds | Area percentage |
|--------------|----------------|---------|-----------------|------|-------------------|-----------------|
| 1            | 14.746         | 289717  | 21844           |      |                   | 19.258          |
| 2            | 30.087         | 78522   | 2651            |      |                   | 5.220           |
| 3            | 31.891         | 1136148 | 27548           |      |                   | 75.522          |
| Total        |                | 1504387 | 52043           |      |                   | 100.000         |

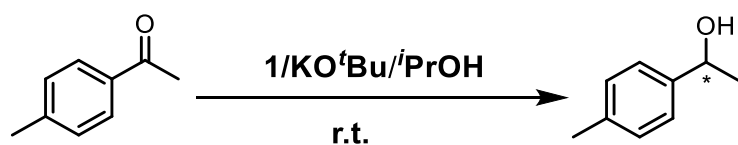

**Figure S16 Gas chromatograph.** Reaction conditions: [Cat] =  $6.48 \times 10^{-4}$  M, [KO<sup>t</sup>Bu] =  $5.24 \times 10^{-3}$  M, [substrate] = 0.397 M, [<sup>i</sup>PrOH] = 12.4 M, 28 °C. GC analysis conditions: Oven temperature (130 °C). Retention time: product minor isomer = 10.4 min, product major isomer (*S*) = 11.3 min, starting material = 7.9 min, 70 % conversion 78 % ee.

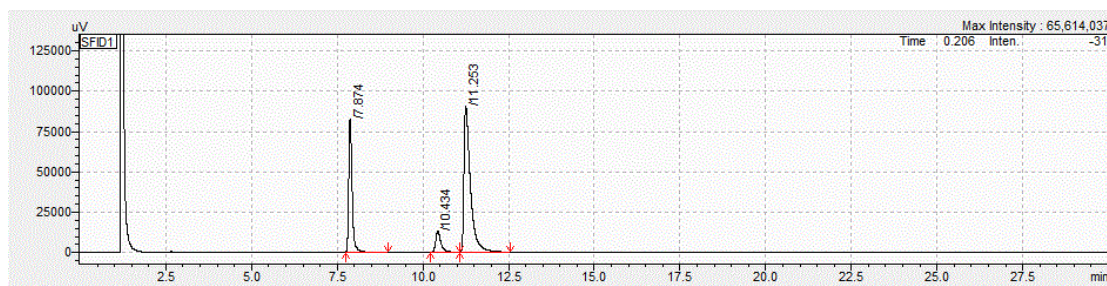

The analysis result is as follow:

| Peaks number | Retention time | Area    | Height of peaks | Mark | Name of compounds | Area percentage |
|--------------|----------------|---------|-----------------|------|-------------------|-----------------|
| 1            | 7.874          | 581484  | 82171           |      |                   | 30.323          |
| 2            | 10.434         | 145063  | 13337           |      |                   | 7.565           |
| 3            | 11.253         | 1191063 | 90481           |      |                   | 62.112          |
| Total        |                | 1917610 | 185988          |      |                   | 100.000         |



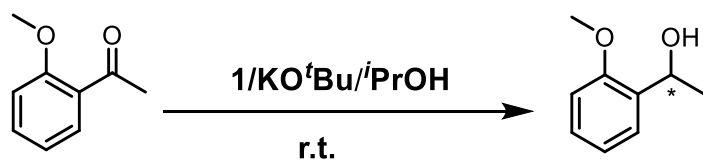

**Figure S17 Gas chromatograph.** Reaction conditions: [Cat] =  $6.48 \times 10^{-4}$  M, [KO<sup>t</sup>Bu] =  $5.24 \times 10^{-3}$  M, [substrate] = 0.397 M, [<sup>i</sup>PrOH] = 12.4 M, 28 °C. GC analysis conditions: Oven temperature (130 °C). Retention time: product major isomer (*S*) = 20.0 min, product minor isomer = 20.6 min, starting material = 13.6 min, 30 % conversion 44 % ee.

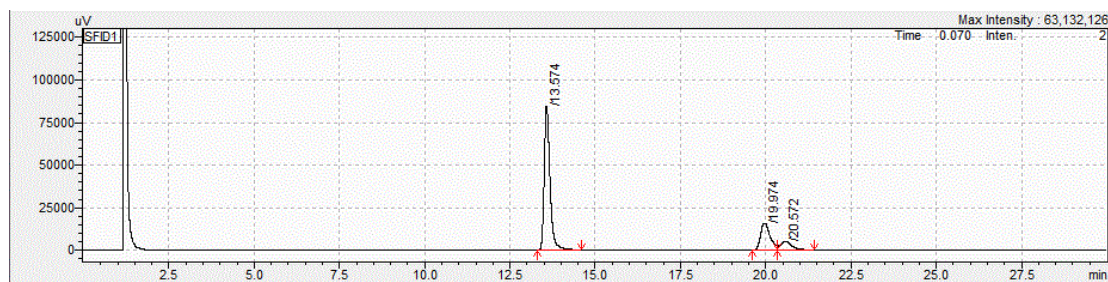

The analysis result is as follow:

| Peaks number | Retention time | Area    | Height of peaks | of | Mark | Name of compounds | Area percentage |
|--------------|----------------|---------|-----------------|----|------|-------------------|-----------------|
| 1            | 13.574         | 999002  | 84546           |    |      |                   | 69.930          |
| 2            | 19.974         | 308499  | 15855           |    |      |                   | 21.595          |
| 3            | 20.572         | 121076  | 5280            |    |      |                   | 8.475           |
| Total        |                | 1428577 | 105681          |    |      |                   | 100.000         |

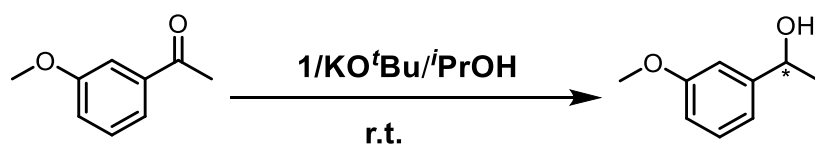

**Figure S18 Gas chromatograph.** Reaction conditions: [Cat] =  $6.48 \times 10^{-4}$  M, [KO<sup>t</sup>Bu] =  $5.24 \times 10^{-3}$  M, [substrate] = 0.397 M, [iPrOH] = 12.4 M, 28 °C. GC analysis conditions: Oven temperature (130 °C). Retention time: product minor isomer = 27.4 min, product major isomer (*S*) = 29.3 min, starting material = 14.8 min, 89 % conversion 80 % ee.

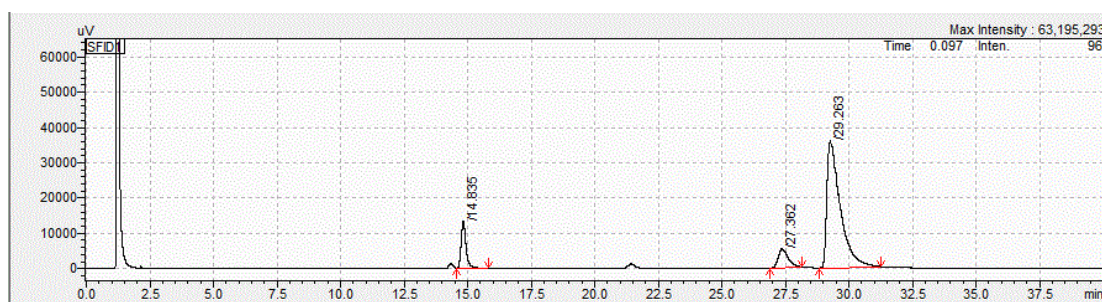

The analysis result is as follow:

| Peaks number | Retention time | Area    | Height of peaks | of | Mark | Name of compounds | Area percentage |
|--------------|----------------|---------|-----------------|----|------|-------------------|-----------------|
| 1            | 14.835         | 175304  | 13360           |    |      |                   | 10.741          |
| 2            | 27.362         | 143936  | 5321            |    |      |                   | 8.819           |
| 3            | 29.263         | 1312852 | 35993           |    |      |                   | 80.440          |
| Total        |                | 1632092 | 54675           |    |      |                   | 100.000         |

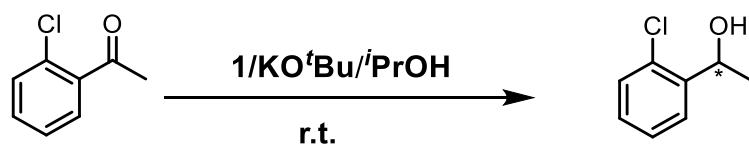

**Figure S19 Gas chromatograph.** Reaction conditions: [Cat] =  $6.48 \times 10^{-4}$  M, [KO<sup>t</sup>Bu] =  $5.24 \times 10^{-3}$  M, [substrate] = 0.397 M, [<sup>i</sup>PrOH] = 12.4 M, 28 °C. GC analysis conditions: Oven temperature (150 °C). Retention time: product minor isomer = 8.6 min, product major isomer (*S*) = 9.2 min, starting material = 4.6 min, 99 % conversion 87 % ee.

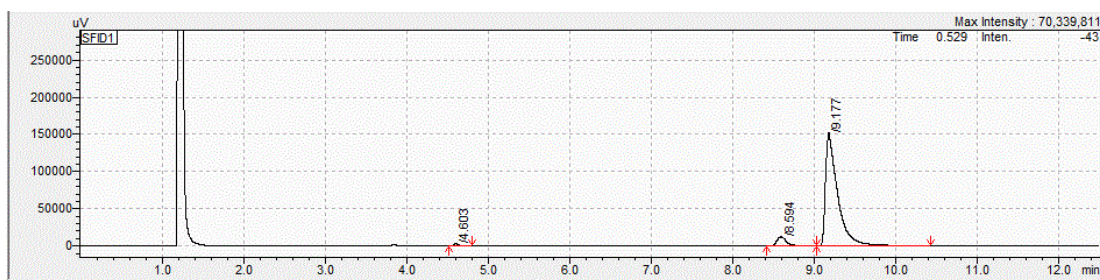

The analysis result is as follow:

| Peaks number | Retention time | Area    | Height of peaks | Mark | Name of compounds | Area percentage |
|--------------|----------------|---------|-----------------|------|-------------------|-----------------|
| 1            | 4.603          | 13557   | 3344            |      |                   | 0.802           |
| 2            | 8.594          | 106824  | 12548           |      |                   | 6.318           |
| 3            | 9.177          | 1570314 | 152784          |      |                   | 92.880          |
| Total        |                | 1690695 | 168677          |      |                   | 100.000         |

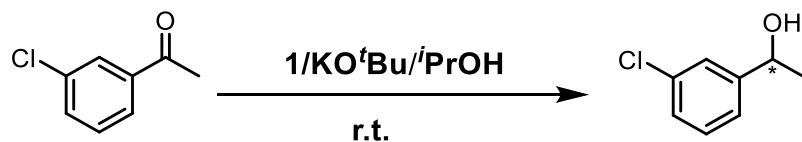

**Figure S20 Gas chromatograph.** Reaction conditions: [Cat] =  $6.48 \times 10^{-4}$  M, [KO<sup>t</sup>Bu] =  $5.24 \times 10^{-3}$  M, [substrate] = 0.397 M, [<sup>i</sup>PrOH] = 12.4 M, 28 °C. GC analysis conditions: Oven temperature (120 °C). Retention time: product minor isomer = 41.7 min, product major isomer (*S*) = 45.8 min, starting material = 15.0 min, 96 % conversion 84 % ee.

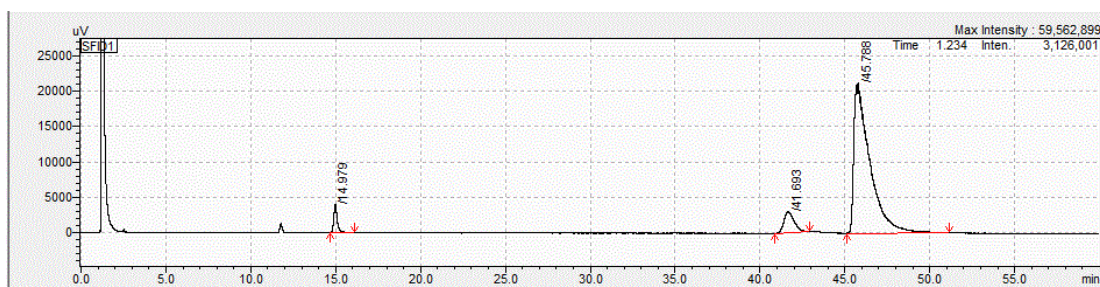

The analysis result is as follow:

| Peaks number | Retention time | Area    | Height of peaks | of | Mark | Name of compounds | Area percentage |
|--------------|----------------|---------|-----------------|----|------|-------------------|-----------------|
| 1            | 14.979         | 57867   | 4020            |    |      |                   | 3.674           |
| 2            | 41.693         | 122112  | 3025            |    |      |                   | 7.753           |
| 3            | 45.788         | 1395049 | 21298           |    |      |                   | 88.573          |
| Total        |                | 1575027 | 28343           |    |      |                   | 100.000         |

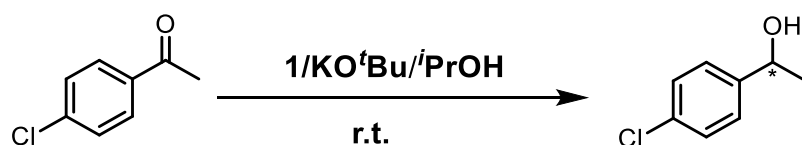

**Figure S21 Gas chromatograph.** Reaction conditions: [Cat] =  $6.48 \times 10^{-4}$  M, [KO<sup>t</sup>Bu] =  $5.24 \times 10^{-3}$  M, [substrate] = 0.397 M, [<sup>i</sup>PrOH] = 12.4 M, 28 °C. GC analysis conditions: Oven temperature (130 °C). Retention time: product minor isomer = 25.7 min, product major isomer (*S*) = 28.6 min, starting material = 11.9 min, 93 % conversion 72 % ee.

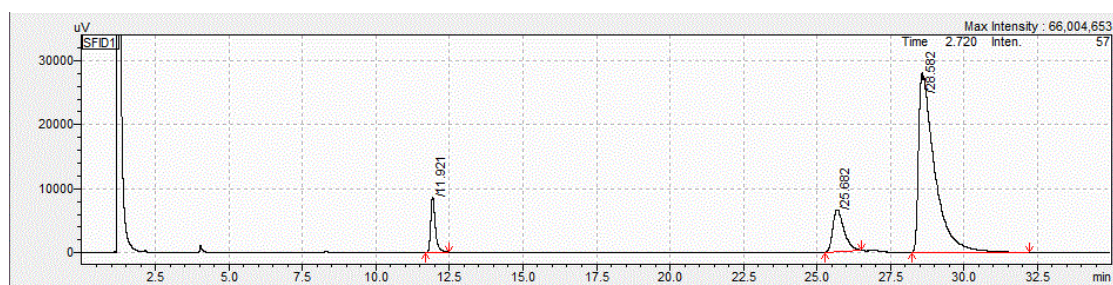

The analysis result is as follow:

| Peaks number | Retention time | Area    | Height of peaks | Mark | Name of compounds | Area percentage |
|--------------|----------------|---------|-----------------|------|-------------------|-----------------|
| 1            | 11.921         | 95840   | 8621            |      |                   | 7.205           |
| 2            | 25.682         | 174046  | 6525            |      |                   | 13.085          |
| 3            | 28.582         | 1060273 | 27949           |      |                   | 79.710          |
| Total        |                | 1330159 | 43095           |      |                   | 100.000         |

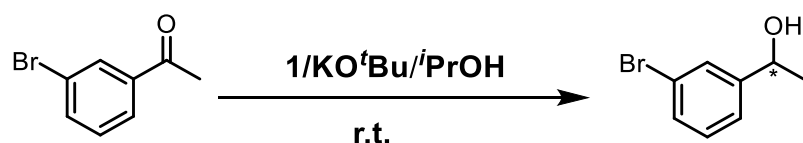

**Figure S22 Gas chromatograph.** Reaction conditions: [Cat] =  $6.48 \times 10^{-4}$  M, [KO<sup>t</sup>Bu] =  $5.24 \times 10^{-3}$  M, [substrate] = 0.397 M, [<sup>i</sup>PrOH] = 12.4 M, 28 °C. GC analysis conditions: Oven temperature (130 °C). Retention time: product minor isomer = 42.0 min, product major isomer (*S*) = 44.8 min, starting material = 4.6 min, 93 % conversion 72 % ee.

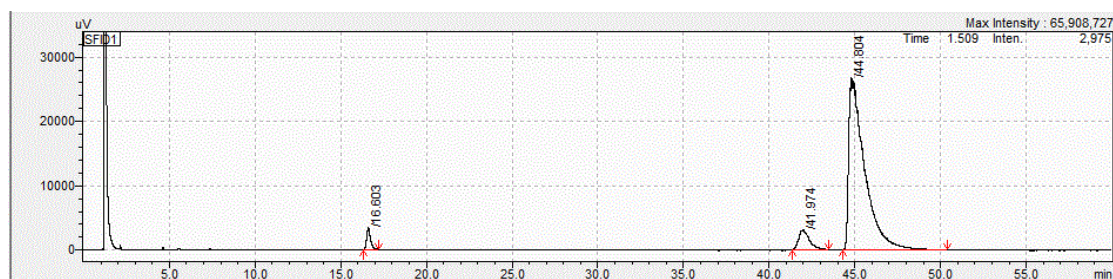

The analysis result is as follow:

| Peaks number | Retention time | Area    | Height of peaks | Mark | Name of compounds | Area percentage |
|--------------|----------------|---------|-----------------|------|-------------------|-----------------|
| 1            | 16.603         | 52866   | 3434            |      |                   | 2.765           |
| 2            | 41.974         | 134902  | 3114            |      |                   | 7.057           |
| 3            | 44.804         | 1723882 | 26775           |      |                   | 90.178          |
| Total        |                | 1911650 | 33323           |      |                   | 100.000         |



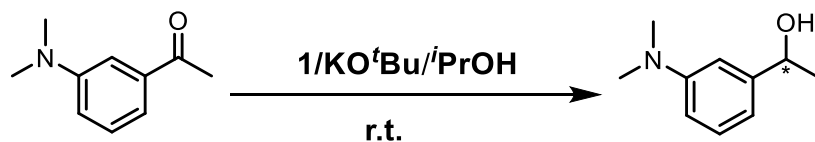

**Figure S23 Gas chromatograph.** Reaction conditions: [Cat] =  $6.48 \times 10^{-4}$  M, [KO<sup>t</sup>Bu] =  $5.24 \times 10^{-3}$  M, [substrate] = 0.397 M, [<sup>i</sup>PrOH] = 12.4 M, 28 °C. GC analysis conditions: Oven temperature (130 °C). Retention time: product minor isomer = 55.1 min, product major isomer (*S*) = 57.4 min, starting material = 39.6 min, 73 % conversion 90% ee.

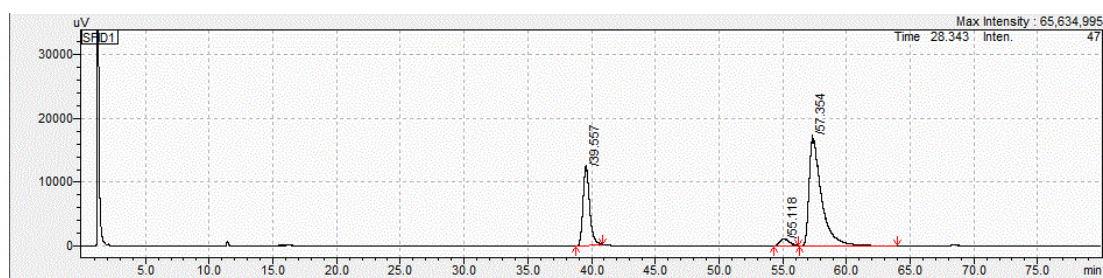

The analysis result is as follow:

| Peaks number | Retention time | Area    | Height of peaks | Mark | Name of compounds | Area percentage |
|--------------|----------------|---------|-----------------|------|-------------------|-----------------|
| 1            | 39.557         | 441429  | 12422           |      |                   | 26.882          |
| 2            | 55.118         | 57853   | 1147            |      |                   | 3.523           |
| 3            | 57.354         | 1142816 | 17291           |      |                   | 69.595          |
| Total        |                | 1642098 | 30859           |      |                   | 100.000         |

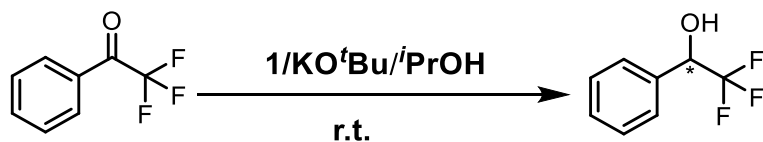

**Figure S24 Gas chromatograph.** Reaction conditions: [Cat] =  $6.48 \times 10^{-4}$  M, [KO<sup>t</sup>Bu] =  $5.24 \times 10^{-3}$  M, [substrate] = 0.397 M, [<sup>i</sup>PrOH] = 12.4 M, 28 °C. GC analysis conditions: Oven temperature (110 °C). Retention time: product minor isomer = 36.1 min, product major isomer (*S*) = 37.3 min, starting material = 2.6 min, 26 % conversion 64 % ee.

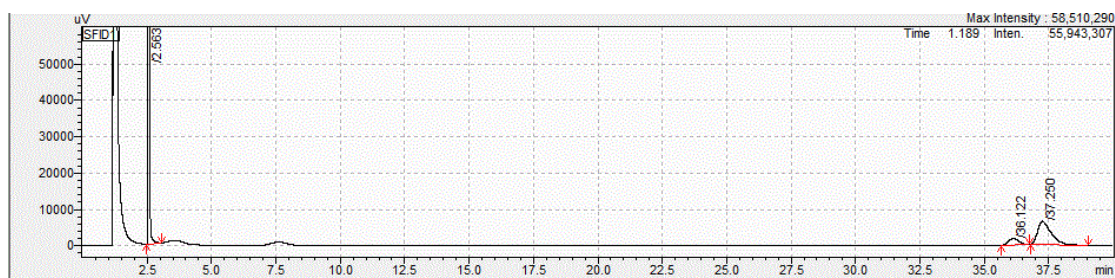

The analysis result is as follow:

| Peaks number | Retention time | Area    | Height of peaks | Mark | Name of compounds | Area percentage |
|--------------|----------------|---------|-----------------|------|-------------------|-----------------|
| 1            | 2.563          | 822132  | 302954          |      |                   | 74.088          |
| 2            | 36.122         | 52200   | 1822            |      |                   | 4.704           |
| 3            | 37.250         | 235339  | 6460            |      |                   | 21.208          |
| Total        |                | 1109671 | 311236          |      |                   | 100.000         |



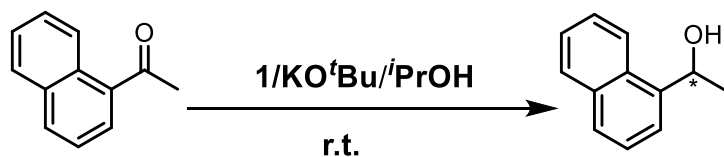

**Figure S25 Gas chromatograph.** Reaction conditions: [Cat] =  $6.48 \times 10^{-4}$  M, [KO<sup>t</sup>Bu] =  $5.24 \times 10^{-3}$  M, [substrate] = 0.397 M, [<sup>i</sup>PrOH] = 12.4 M, 28 °C. GC analysis conditions: Oven temperature (170 °C). Retention time: product major isomer (*S*) = 21.9 min, starting material = 13.0 min, 96 % conversion 99 % ee.

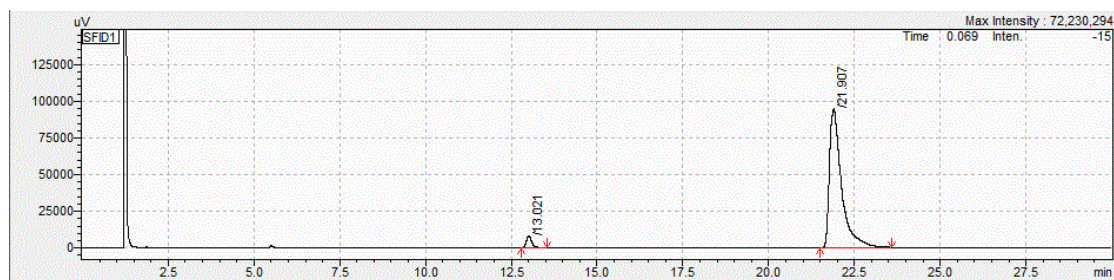

The analysis result is as follow:

| Peaks number | Retention time | Area    | Height of peaks | Mark | Name of compounds | Area percentage |
|--------------|----------------|---------|-----------------|------|-------------------|-----------------|
| 1            | 13.021         | 94011   | 8434            |      |                   | 3.868           |
| 2            | 21.907         | 2336496 | 95106           |      |                   | 96.12           |
| Total        |                | 2430507 | 103540          |      |                   | 100.000         |

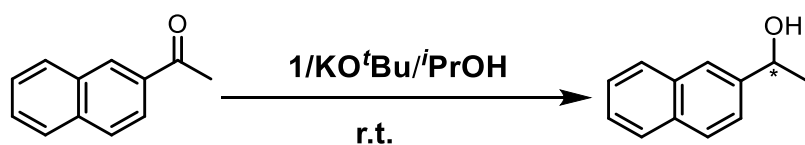

**Figure S26 Gas chromatograph.** Reaction conditions: [Cat] =  $6.48 \times 10^{-4}$  M, [KO<sup>t</sup>Bu] =  $5.24 \times 10^{-3}$  M, [substrate] = 0.397 M, [<sup>i</sup>PrOH] = 12.4 M, 28 °C. GC analysis conditions: Oven temperature (170 °C). Retention time: product minor isomer = 39.7 min, product major isomer (*S*) = 40.7 min, starting material = 29.1 min, 85 % conversion 80 % ee.

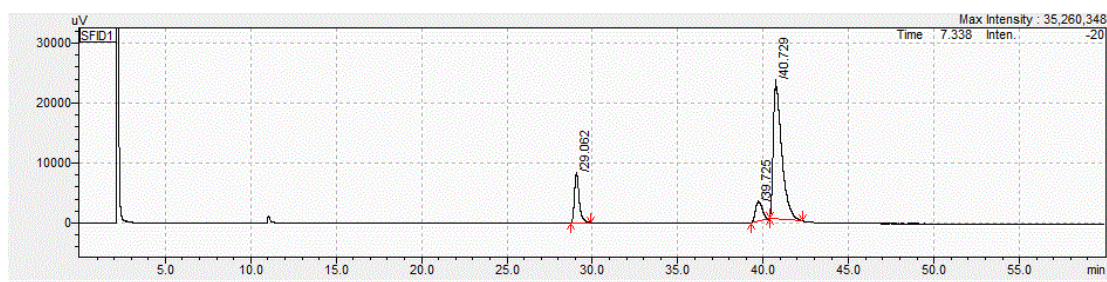

The analysis result is as follow:

| Peaks number | Retention time | Area    | Height of peaks | Mark | Name of compounds | Area percentage |
|--------------|----------------|---------|-----------------|------|-------------------|-----------------|
| 1            | 29.062         | 161110  | 8436            |      |                   | 15.492          |
| 2            | 39.725         | 89071   | 3316            |      |                   | 8.560           |
| 3            | 40.729         | 789805  | 23267           |      |                   | 75.948          |
| Total        |                | 1039932 | 35019           |      |                   | 100.000         |

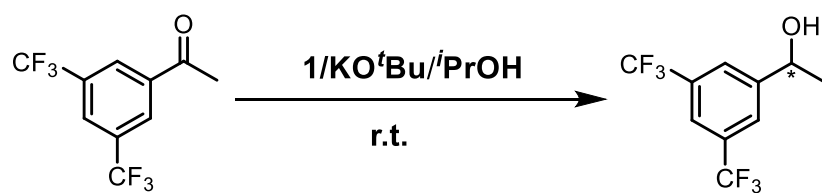

**Figure S27 Gas chromatograph.** Reaction conditions: [Cat] =  $6.48 \times 10^{-4}$  M, [KO<sup>t</sup>Bu] =  $5.24 \times 10^{-3}$  M, [substrate] = 0.397 M, [*i*PrOH] = 12.4 M, 28 °C. GC analysis conditions: Oven temperature (110 °C). Retention time: product major isomer (*S*) = 14.2 min, product minor isomer = 15.2 min, starting material = 3.5 min, 98 % conversion 89% ee.

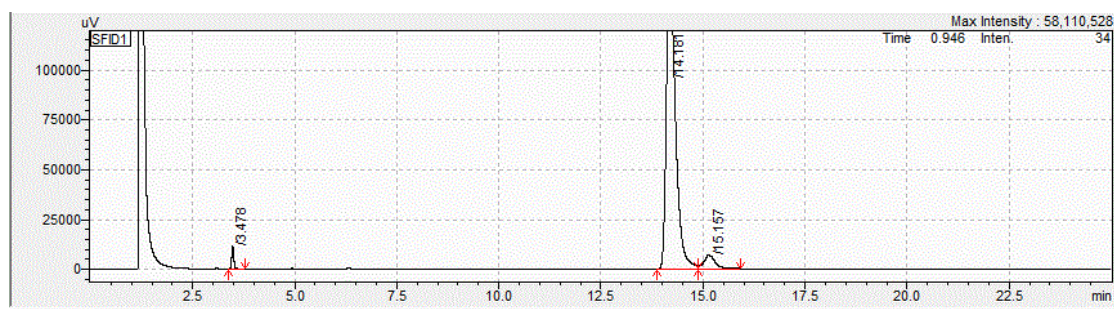

The analysis result is as follow:

| Peaks number | Retention time | Area    | Height of peaks | Mark | Name of compounds | Area percentage |
|--------------|----------------|---------|-----------------|------|-------------------|-----------------|
| 1            | 3.478          | 42455   | 11289           |      |                   | 15.492          |
| 2            | 14.181         | 2339845 | 152818          |      |                   | 8.560           |
| 3            | 15.157         | 135030  | 6977            |      |                   | 75.948          |
| Total        |                | 2517330 | 35019           |      |                   | 100.000         |

7. Copies of  $^1\text{H}$  NMR,  $^{19}\text{F}\{^1\text{H}\}$  NMR,  $^{13}\text{C}\{^1\text{H}\}$  NMR and  $^{31}\text{P}\{^1\text{H}\}$  NMR spectra

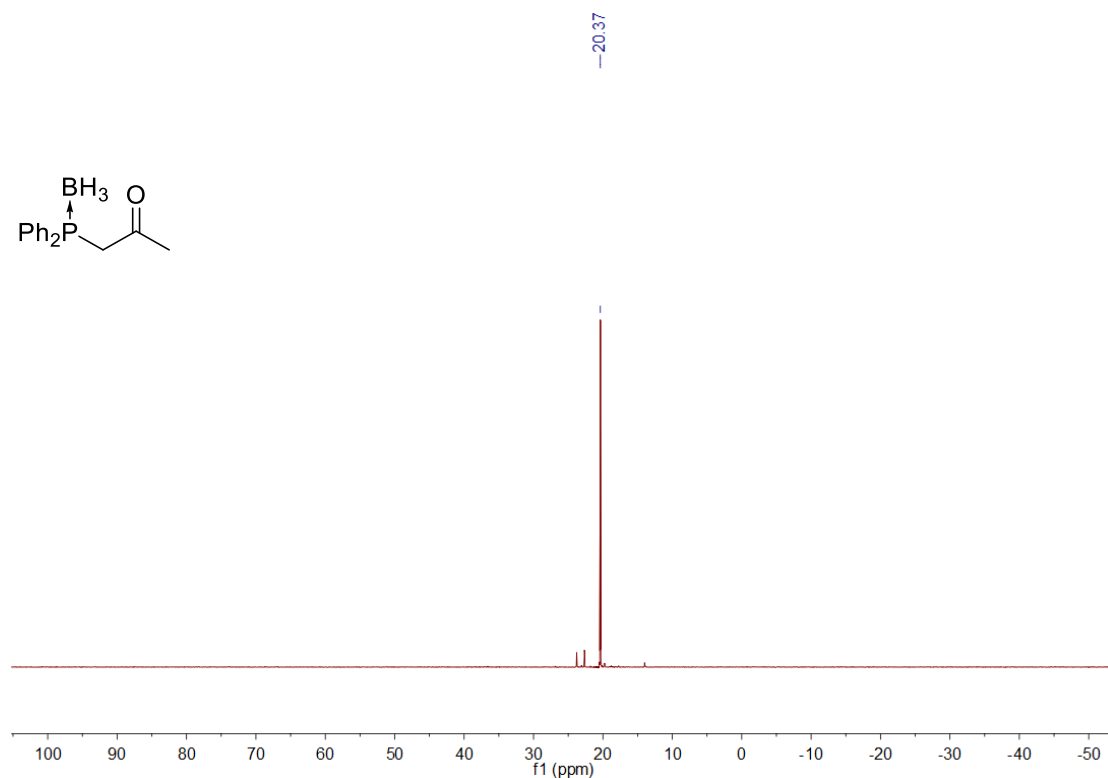

**Figure S28**  $^{31}\text{P}\{^1\text{H}\}$  NMR (243 MHz,  $\text{CDCl}_3$ ) spectrum of borane adduct of *1-(diphenylphosphino)propanone*

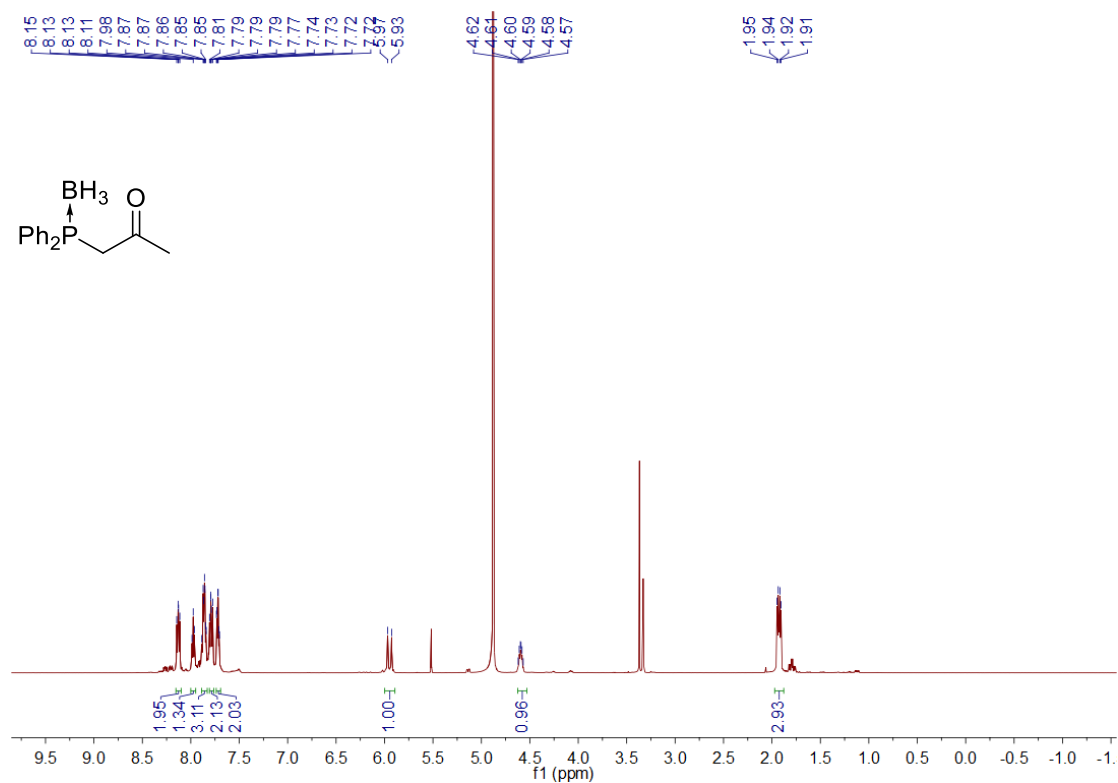

**Figure S29**  $^1\text{H}$  NMR (600 MHz,  $\text{CDCl}_3$ ) spectrum of borane adduct of *1-(diphenylphosphino)propanone*

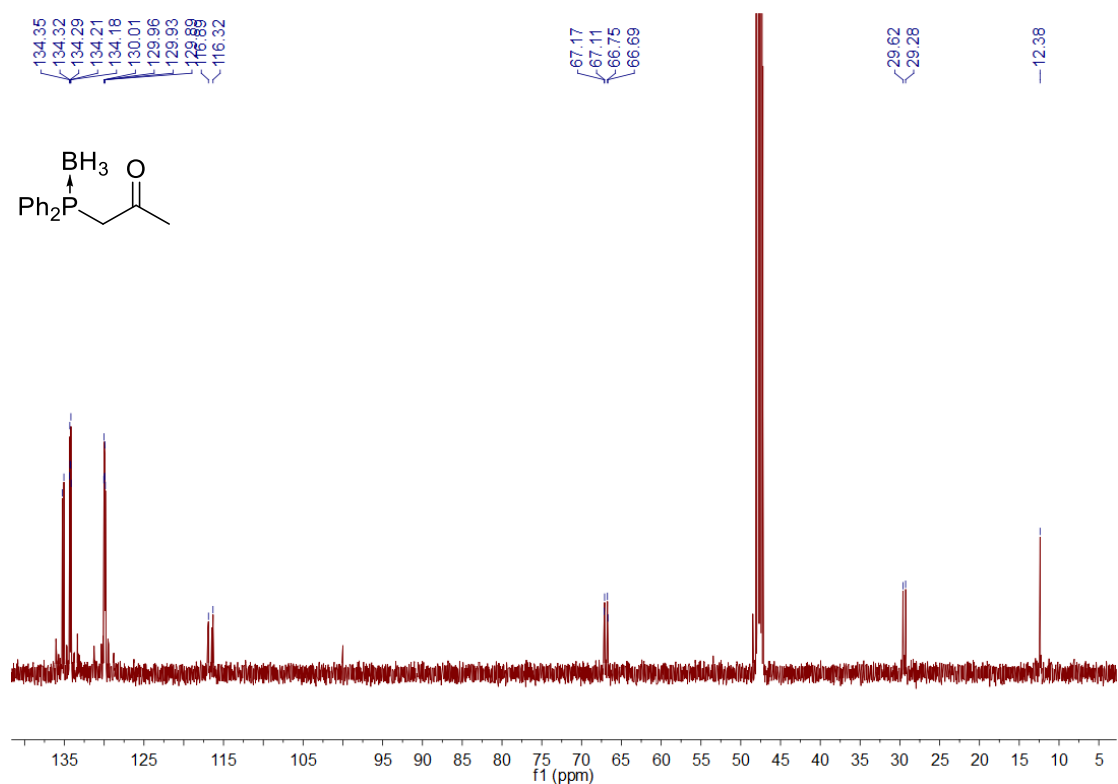

**Figure S30**  $^{13}\text{C}\{^1\text{H}\}$  NMR (151 MHz,  $\text{CDCl}_3$ ) spectrum of borane adduct of 1-(diphenylphosphino)propanone

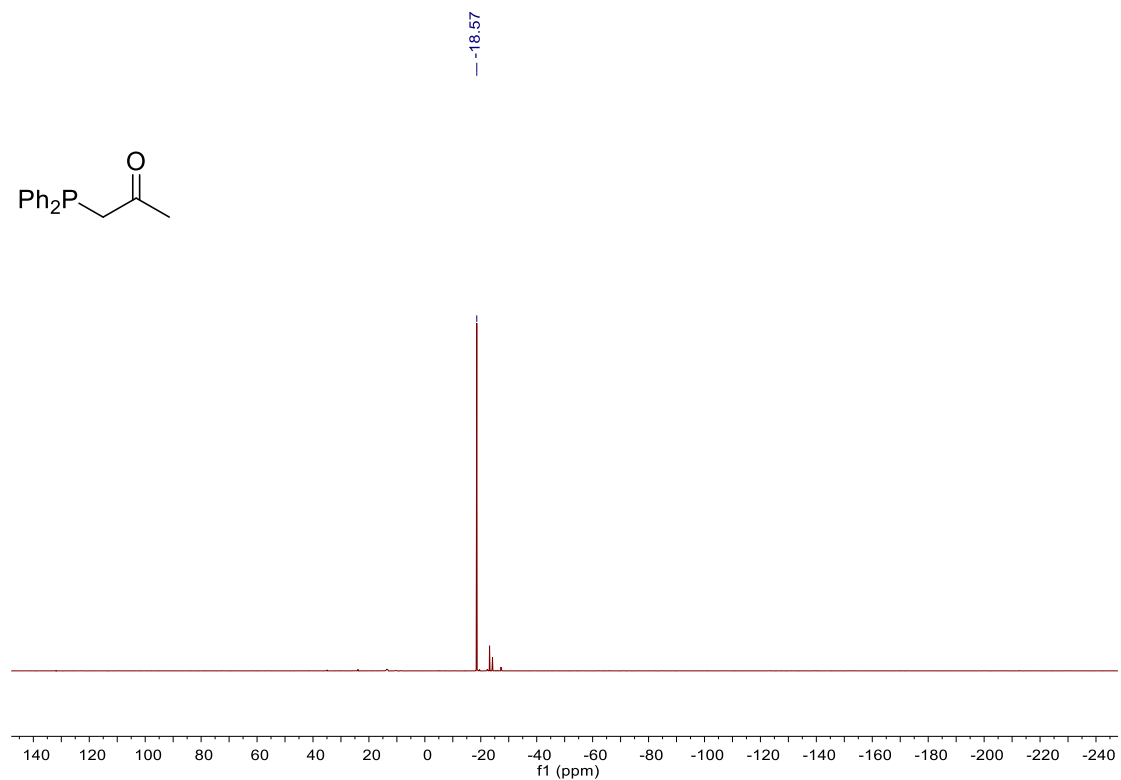

**Figure S31**  $^{31}\text{P}\{^1\text{H}\}$  NMR (243 MHz,  $\text{C}_6\text{D}_6$ ) spectrum of 1-(diphenylphosphino)propanone

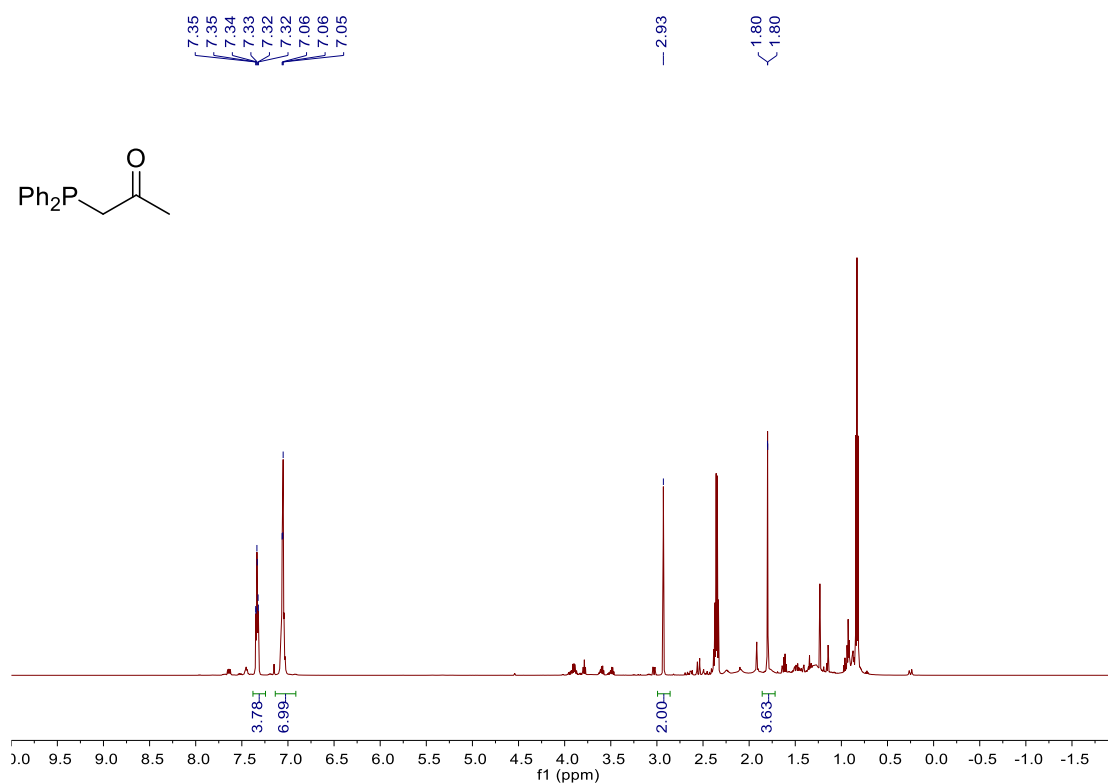

**Figure S32**  $^1\text{H}$  NMR (600 MHz,  $\text{C}_6\text{D}_6$ ) spectrum of *1*-(diphenylphosphino)-propanone

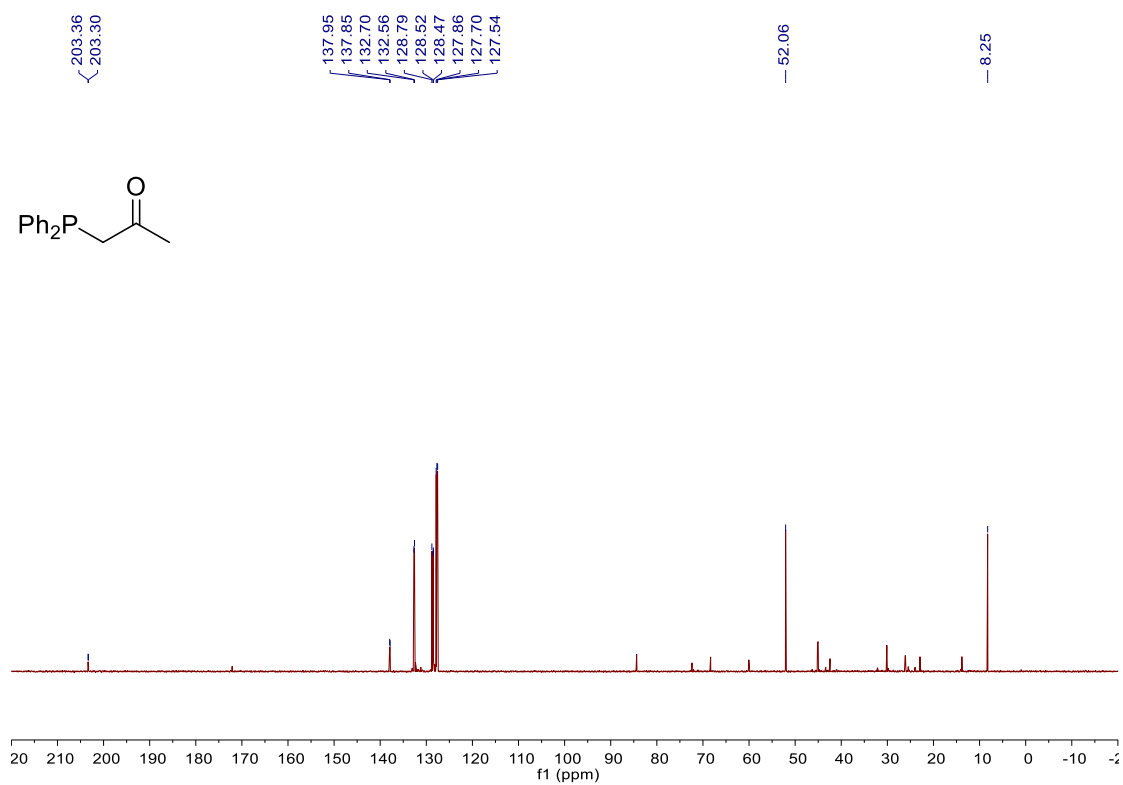

**Figure S33**  $^{13}\text{C}\{^1\text{H}\}$  NMR (151 MHz,  $\text{C}_6\text{D}_6$ ) spectrum of *1*-(diphenylphosphino)-propanone

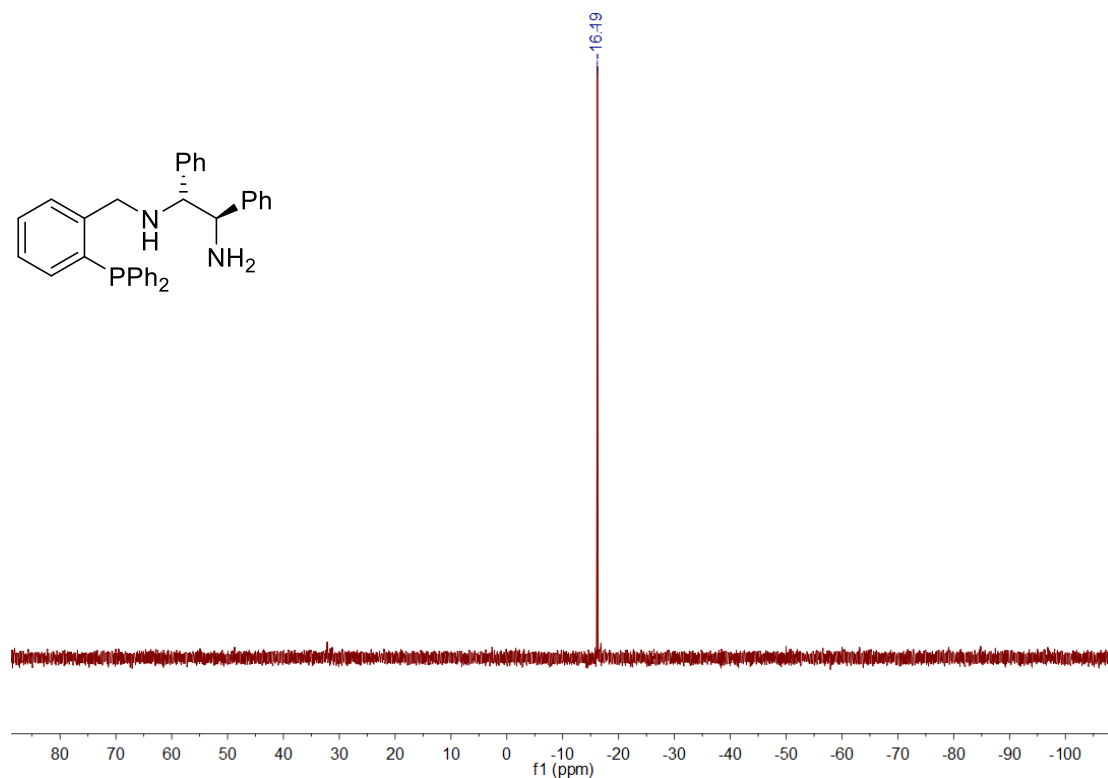

**Figure S34**  $^{31}\text{P}\{^1\text{H}\}$  NMR (243 MHz,  $\text{CDCl}_3$ ) spectrum of *N'*-[2-(diphenylphosphino)phenyl]methyl]-1,2-diphenyl-(1*R*,2*R*)-1,2-ethanediamine

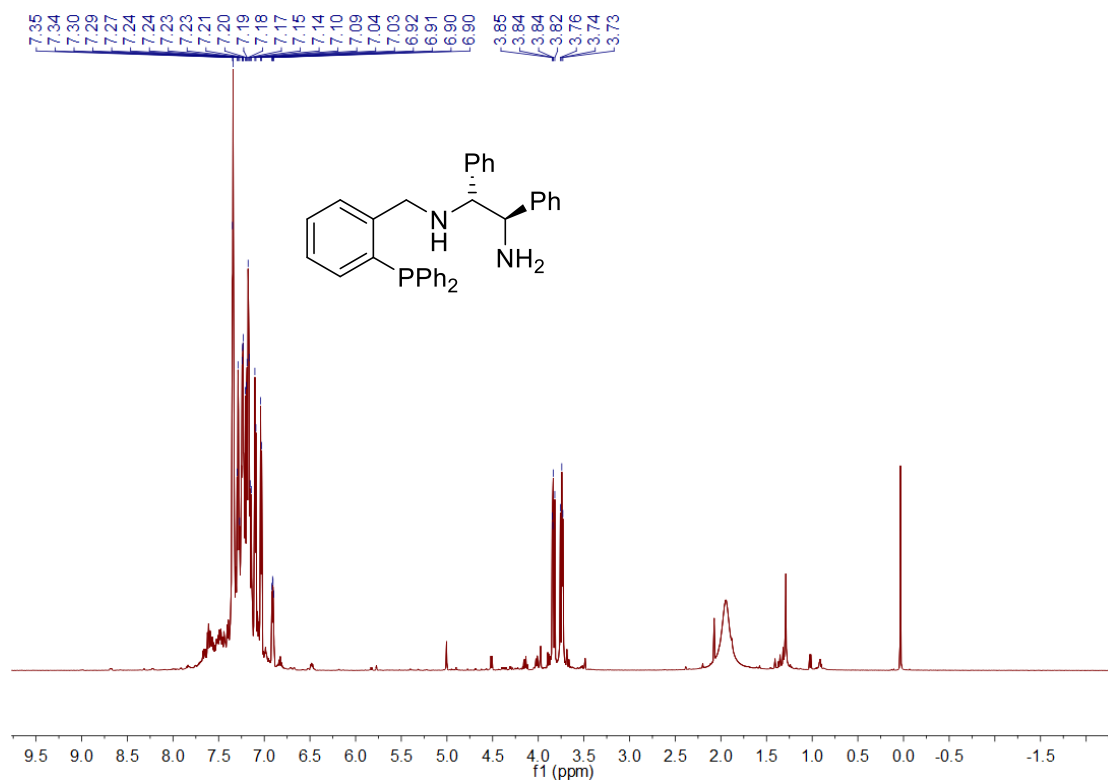

**Figure S35**  $^1\text{H}$  NMR (600 MHz,  $\text{CDCl}_3$ ) spectrum of *N'*-[2-(diphenylphosphino)phenyl]methyl]-1,2-diphenyl-(1*R*,2*R*)-1,2-ethanediamine

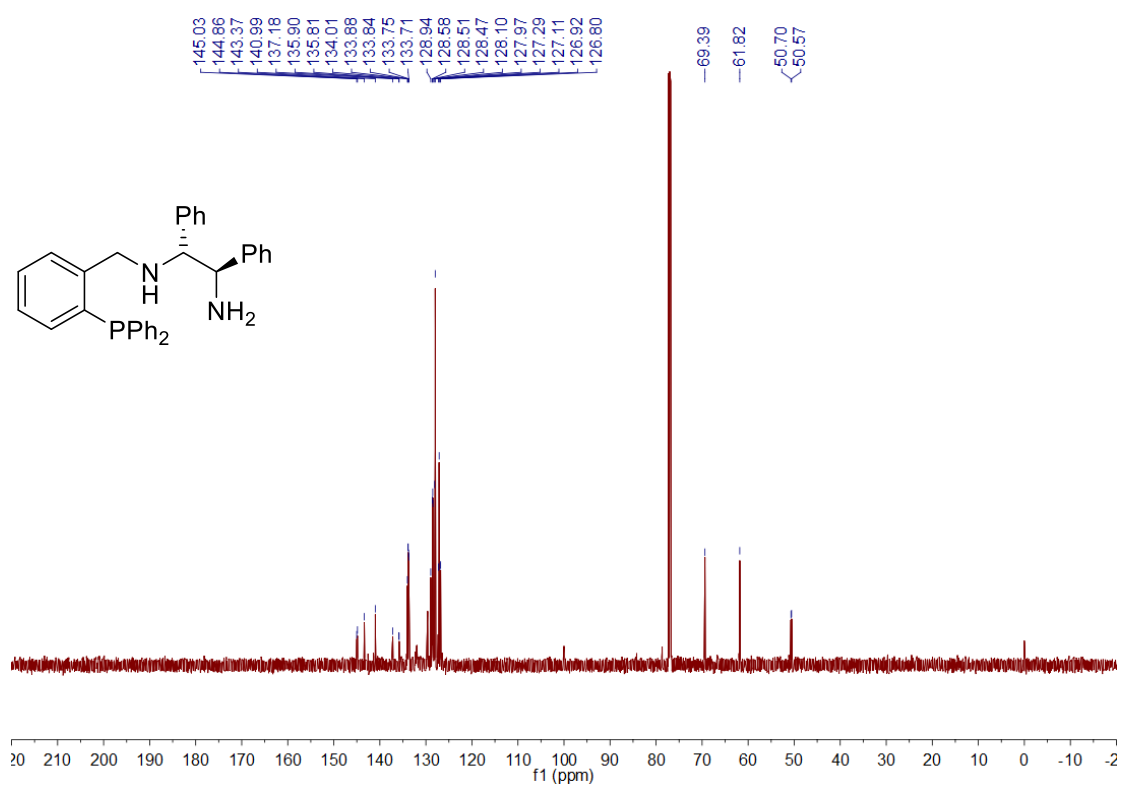

**Figure S36**  $^{13}\text{C}\{^1\text{H}\}$  NMR (151 MHz,  $\text{CDCl}_3$ ) spectrum of *N'*-[2-(diphenylphosphino)phenyl]methyl]-1,2-diphenyl-(1*R*,2*R*)-1,2-ethanediamine

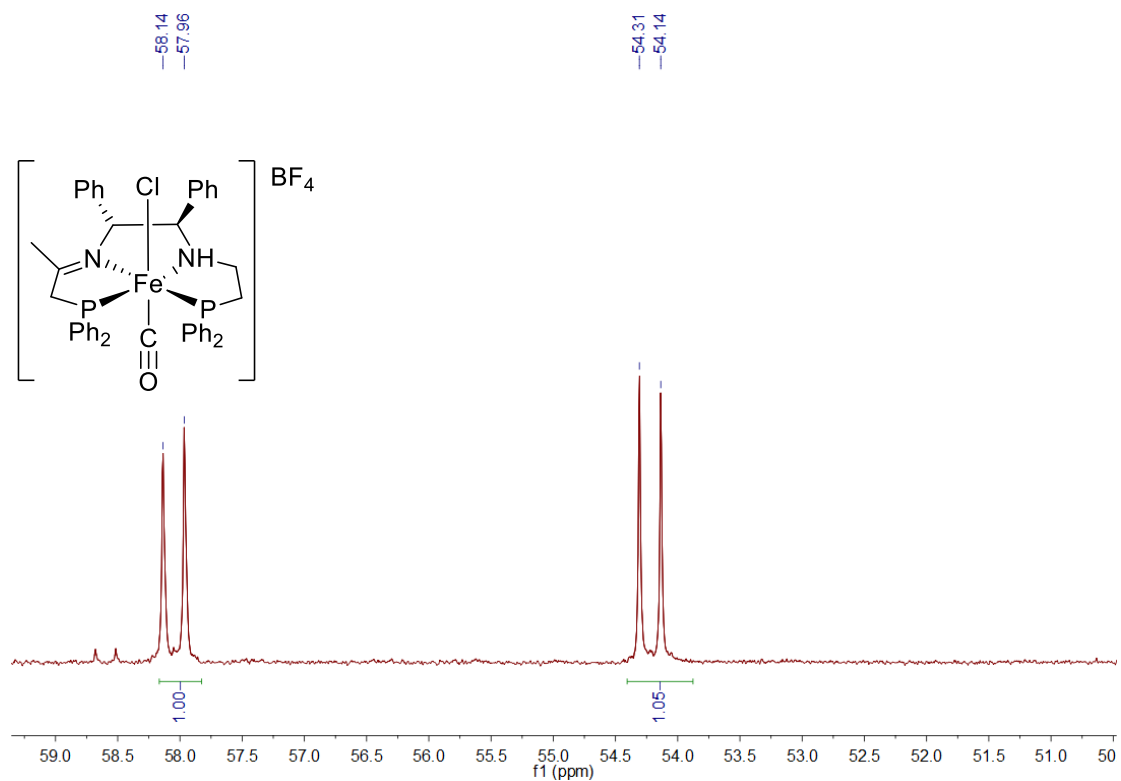

**Figure S37**  $^{31}\text{P}\{^1\text{H}\}$  NMR (243 MHz,  $\text{CDCl}_3$ ) spectrum of **1**.



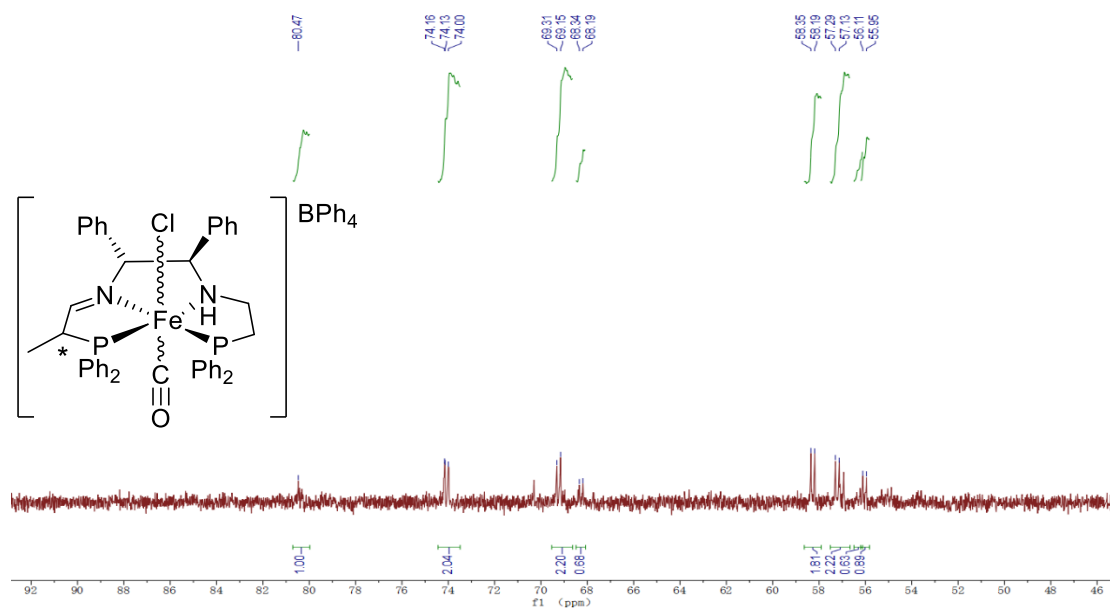

**Figure S38**  $^{31}\text{P}\{^1\text{H}\}$  NMR (243 MHz,  $\text{CDCl}_3$ ) spectrum of **2**.

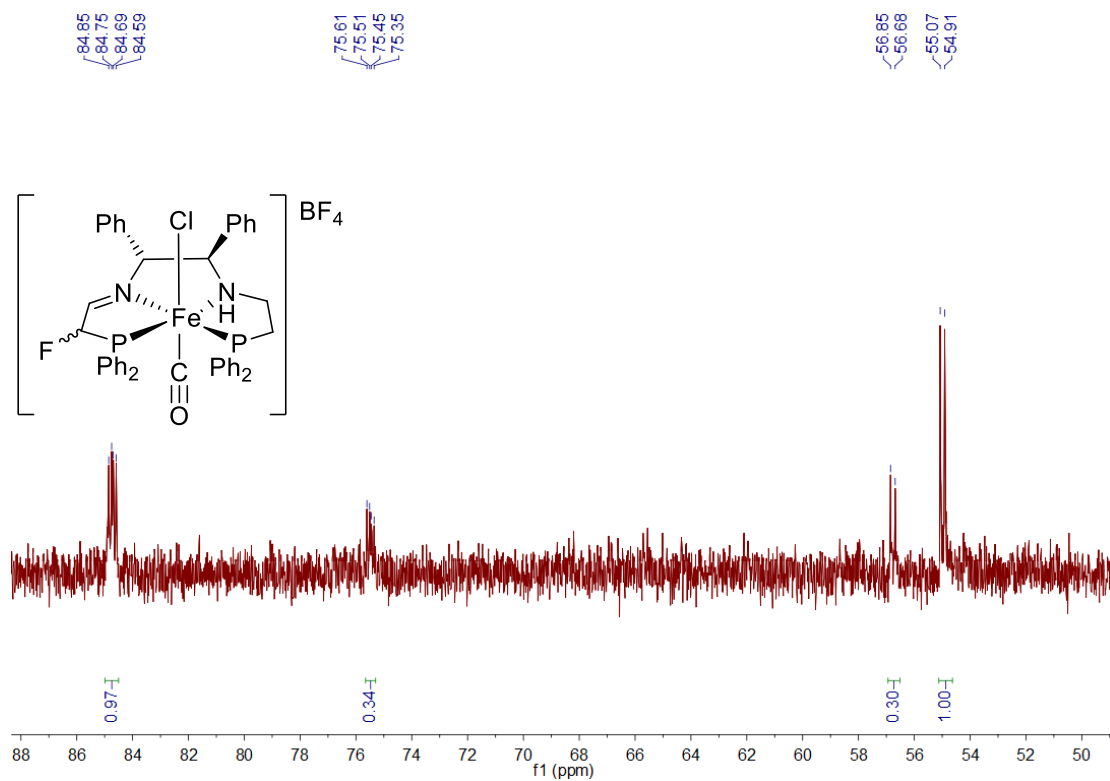

**Figure S39**  $^{31}\text{P}\{^1\text{H}\}$  NMR (243 MHz,  $\text{CDCl}_3$ ) spectrum of **3**.

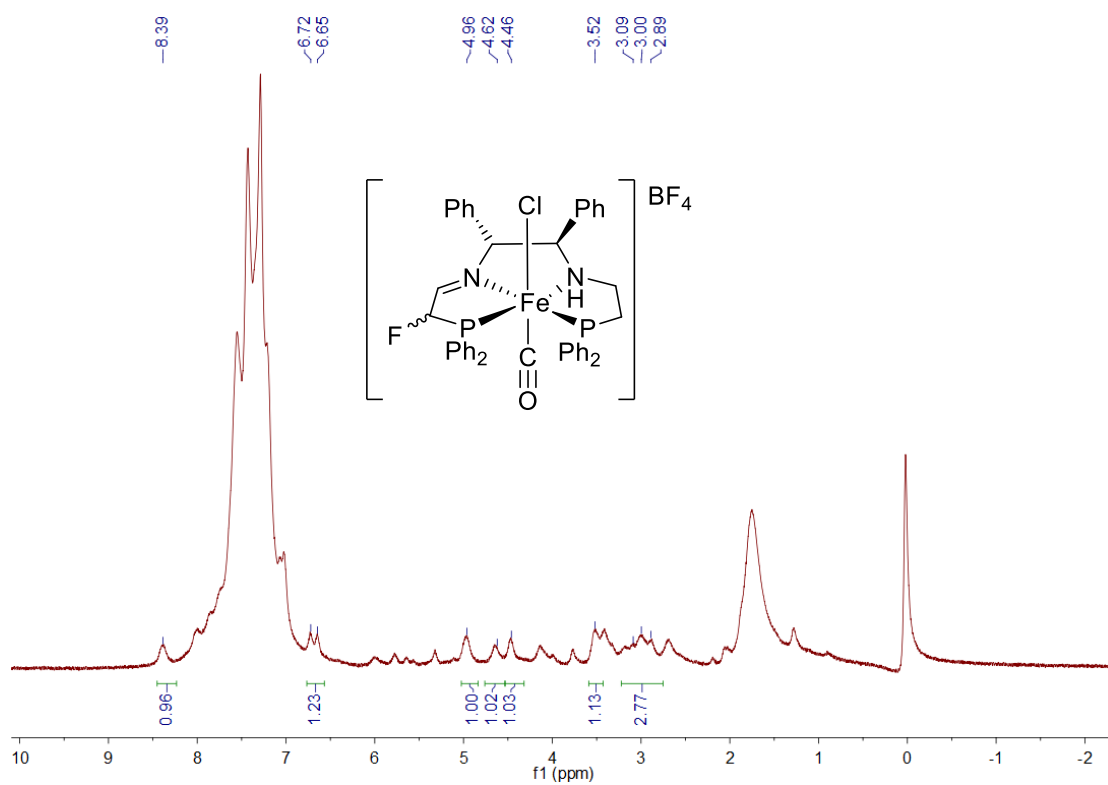

**Figure S40**  $^1\text{H}$  NMR (600 MHz,  $\text{CDCl}_3$ ) spectrum of **3**.

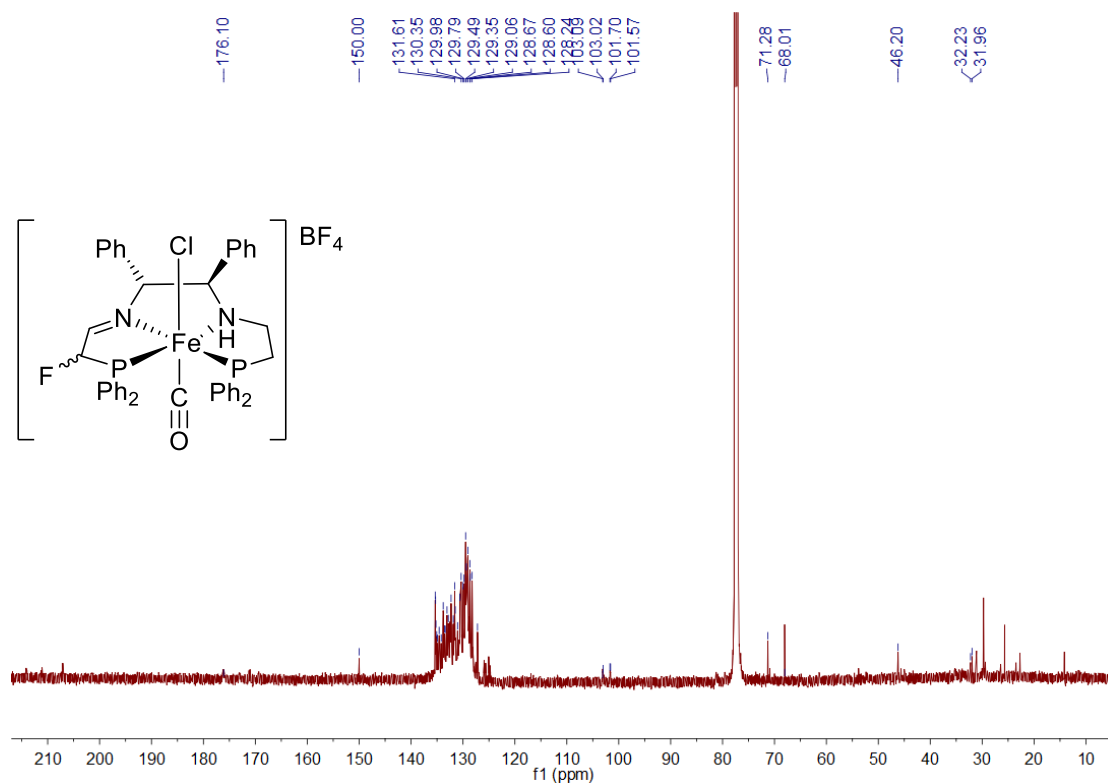

**Figure S41**  $^{13}\text{C}\{^1\text{H}\}$  NMR (151 MHz,  $\text{CDCl}_3$ ) spectrum of **3**.

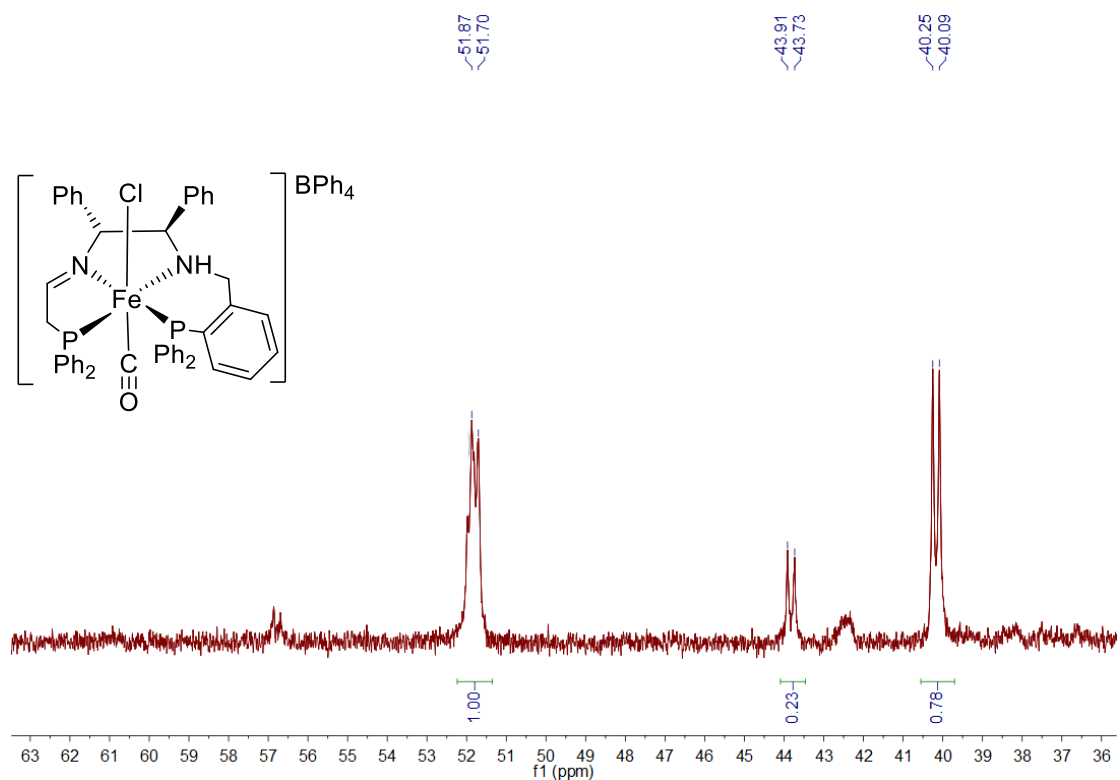

**Figure S42** <sup>31</sup>P{<sup>1</sup>H} NMR (243 MHz, CDCl<sub>3</sub>) spectrum of **4**.

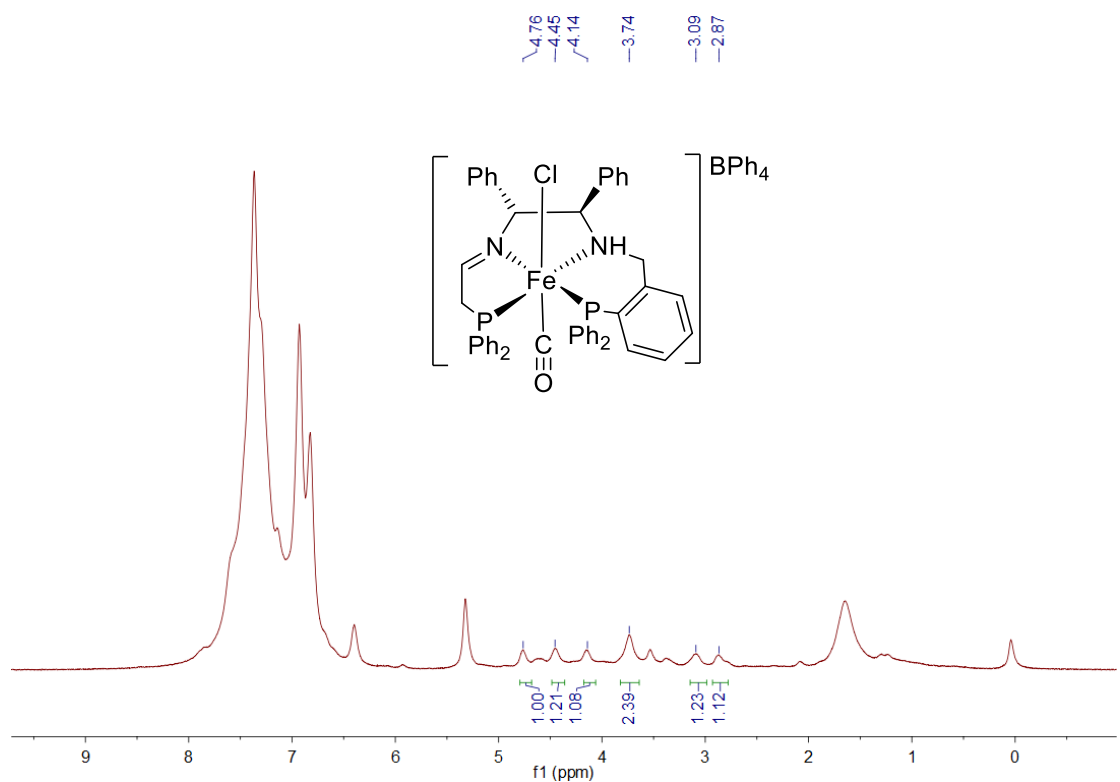

**Figure S43** <sup>1</sup>H NMR (600 MHz, CDCl<sub>3</sub>) spectrum of **4**.

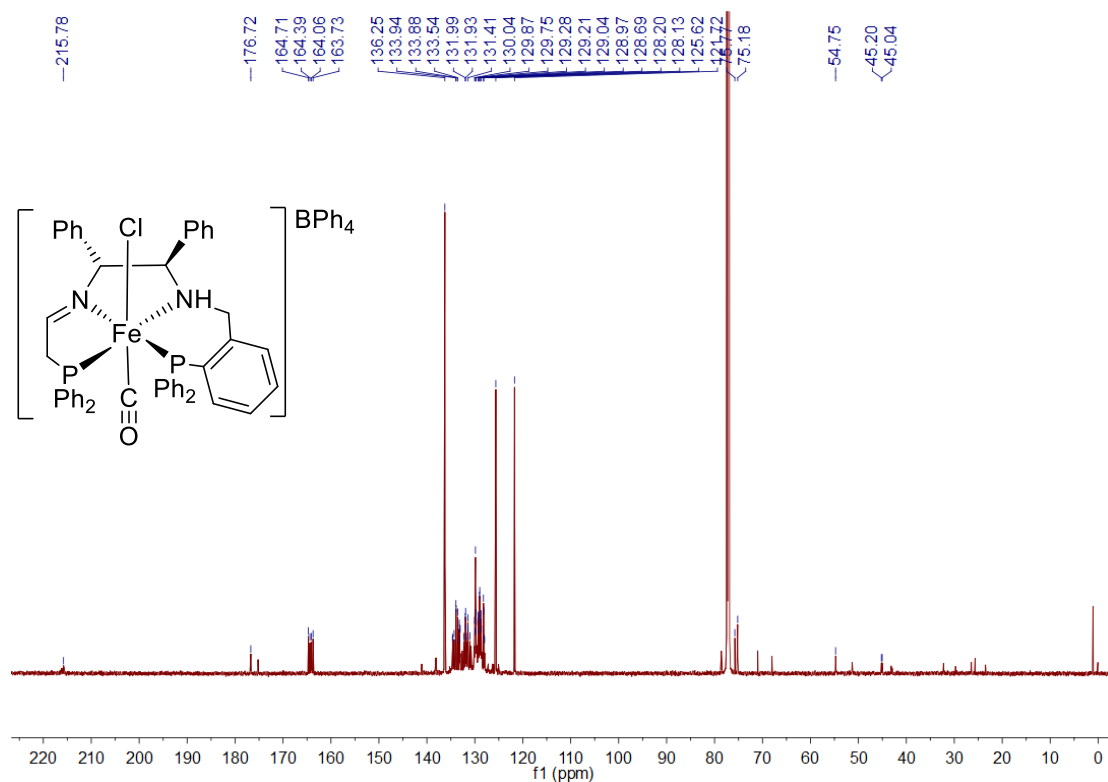

**Figure S44**  $^{13}\text{C}\{^1\text{H}\}$  NMR (151 MHz,  $\text{CDCl}_3$ ) spectrum of **4**.

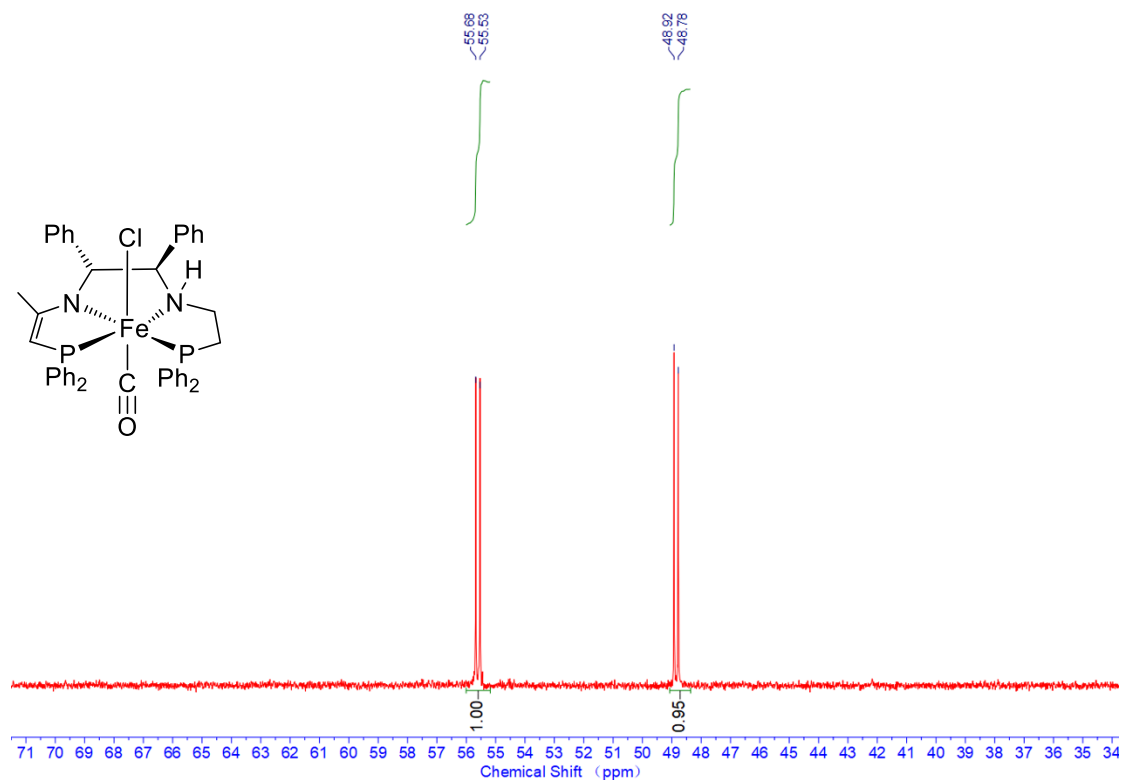

**Figure S45**  $^{31}\text{P}\{^1\text{H}\}$  NMR (243 MHz,  $\text{C}_6\text{D}_6$ ) spectrum of **1a**.

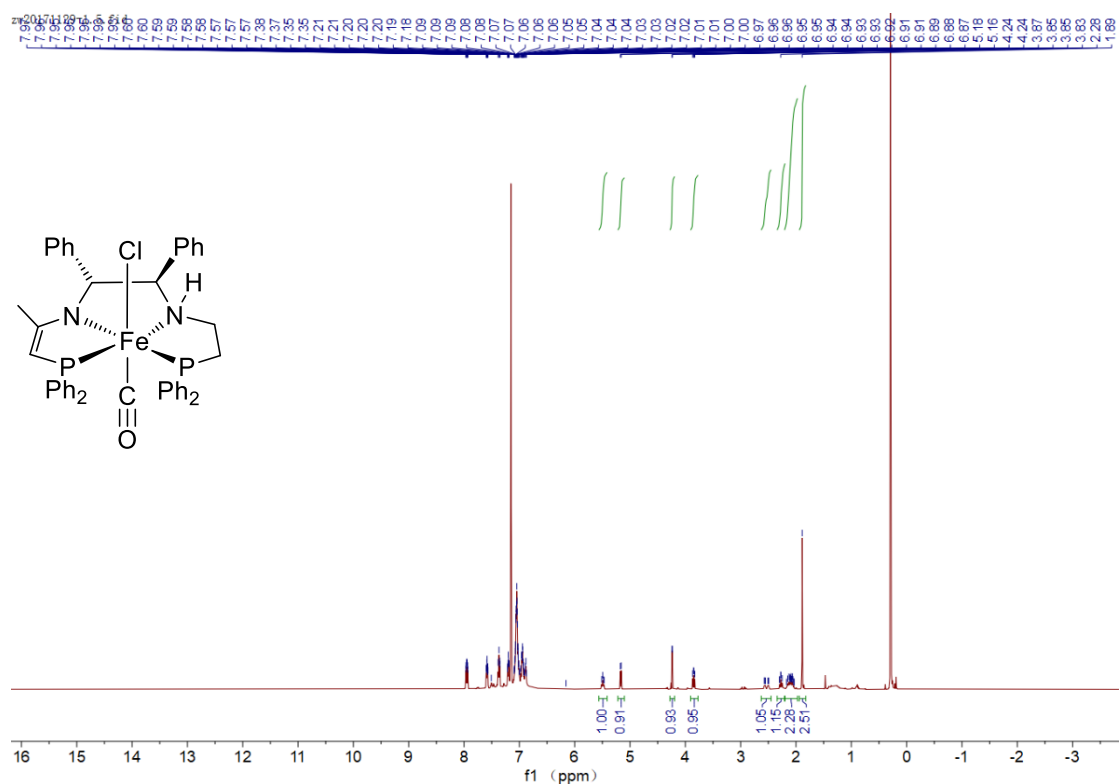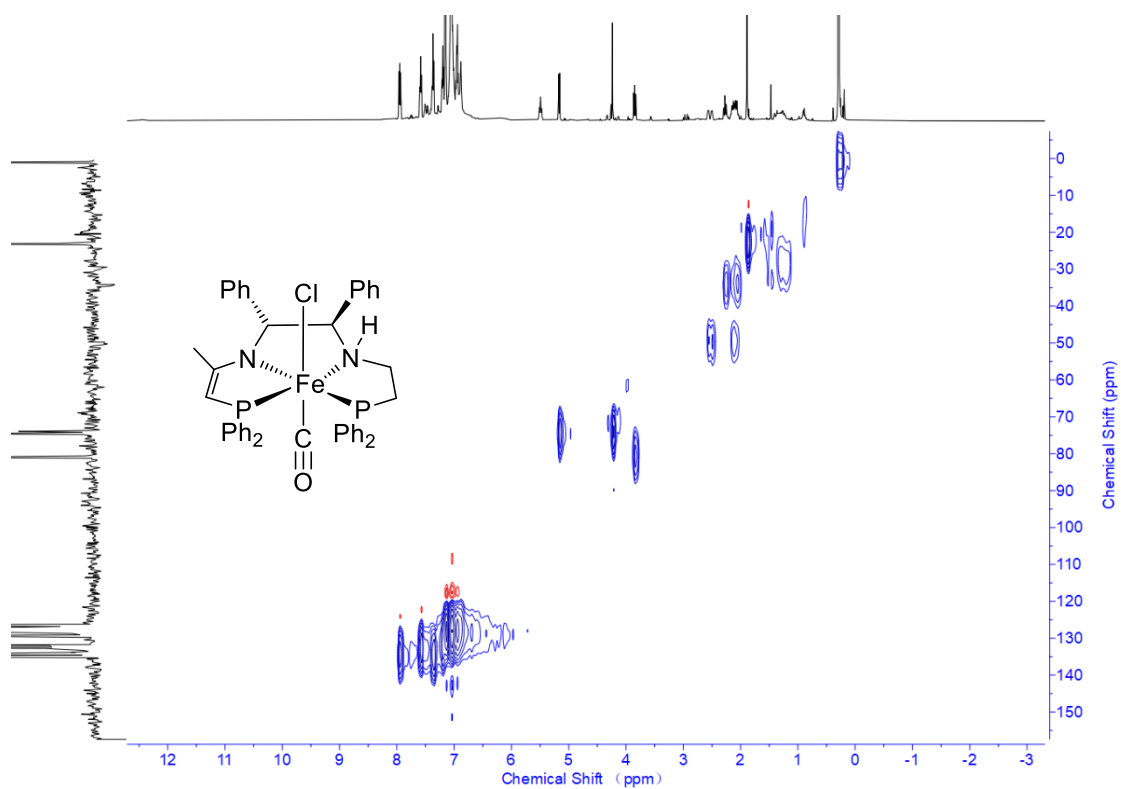

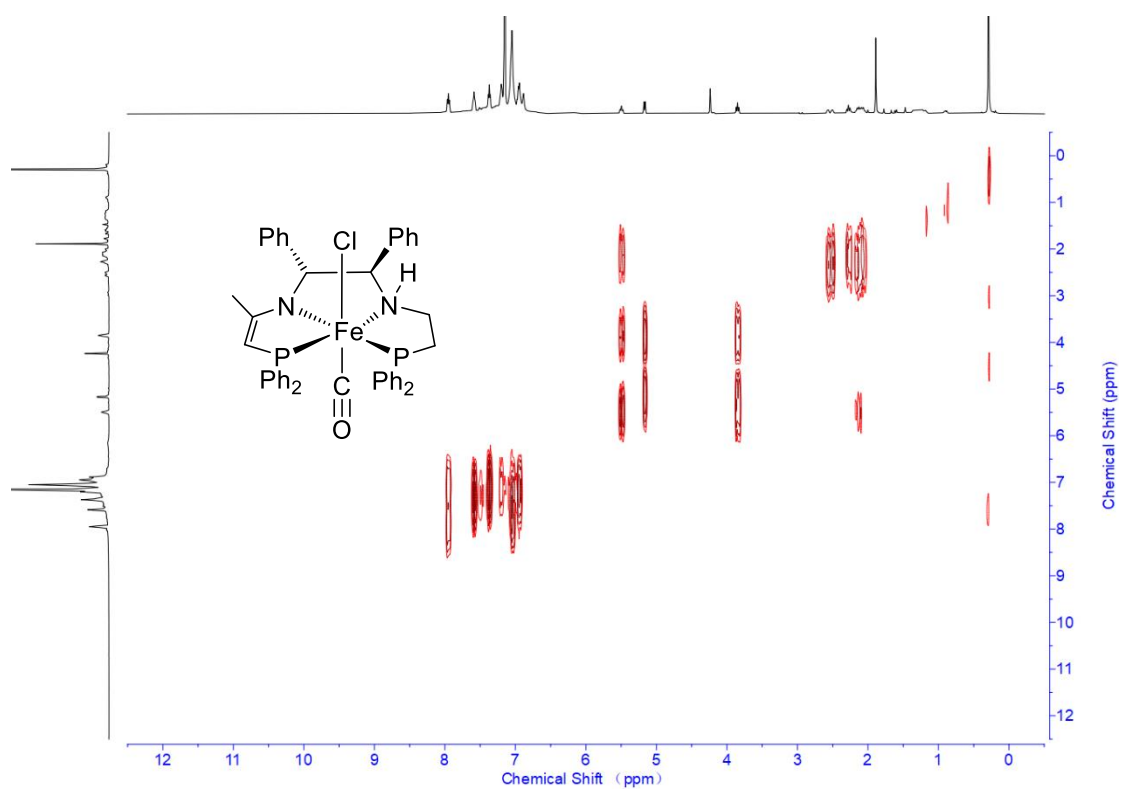

**Figure S48**  $^1\text{H}$ - $^1\text{H}$  COSY NMR (600 MHz,  $\text{C}_6\text{D}_6$ ) spectrum of **1a**.

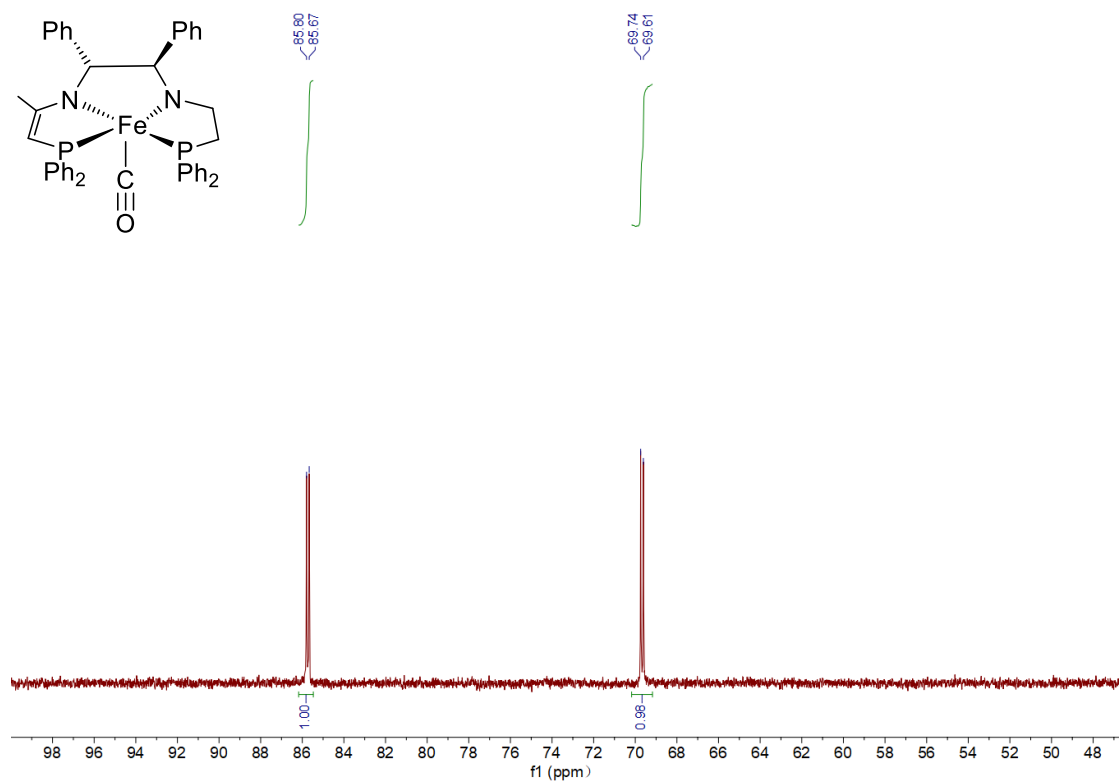

**Figure S49**  $^{31}\text{P}\{^1\text{H}\}$  NMR (243 MHz,  $\text{C}_6\text{D}_6$ ) spectrum of **1b**.

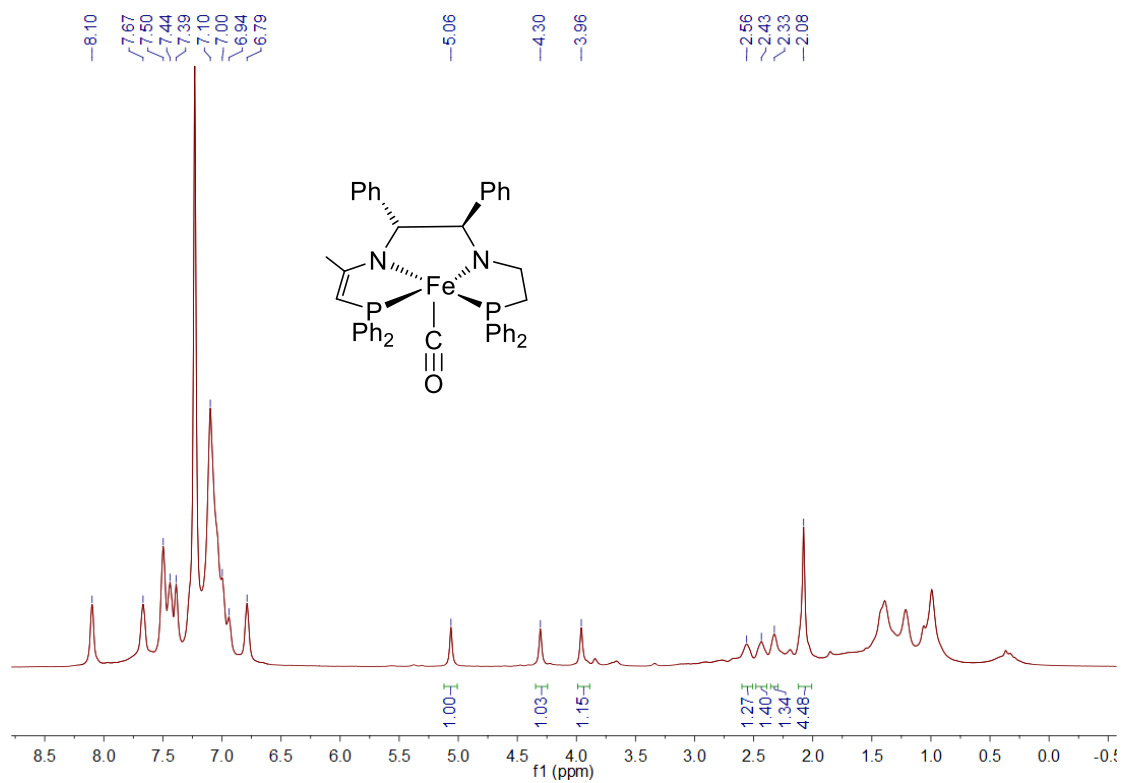

**Figure S50** <sup>1</sup>H NMR (600 MHz, C<sub>6</sub>D<sub>6</sub>) spectrum of **1b**.

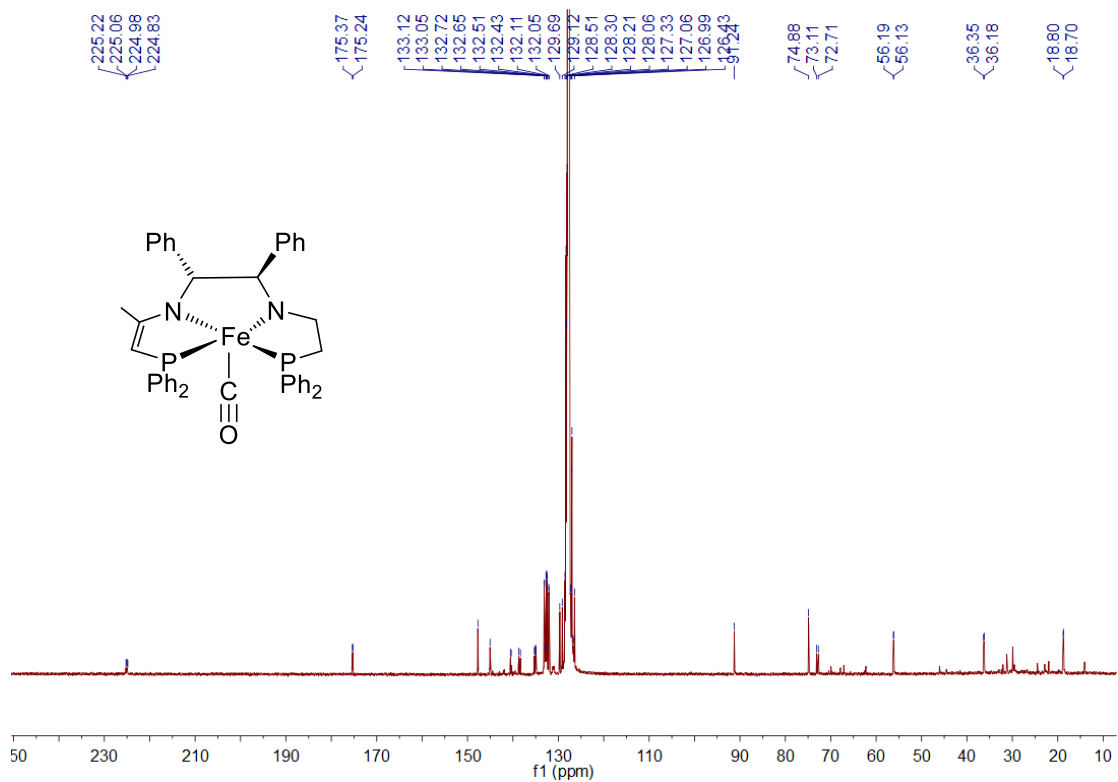

**Figure S51** <sup>13</sup>C{<sup>1</sup>H} NMR (151 MHz, C<sub>6</sub>D<sub>6</sub>) spectrum of **1b**.

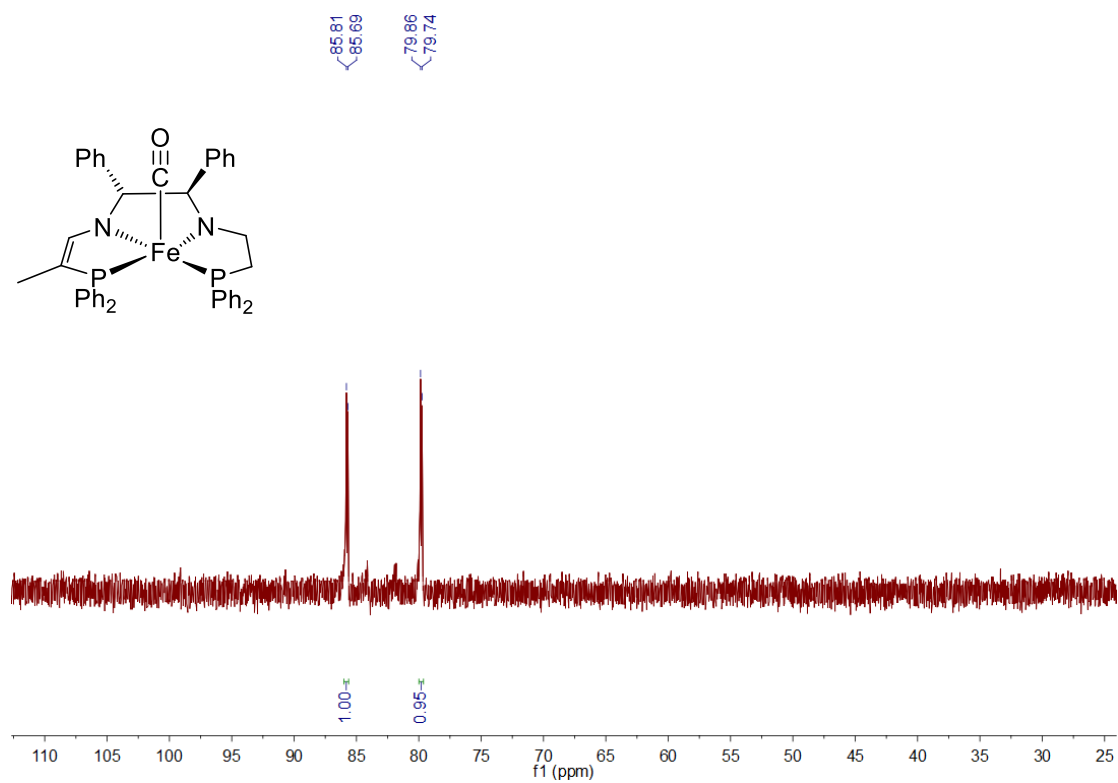

**Figure S52**  $^{31}\text{P}\{^1\text{H}\}$  NMR (243 MHz,  $\text{C}_6\text{D}_6$ ) spectrum of **2a'**.

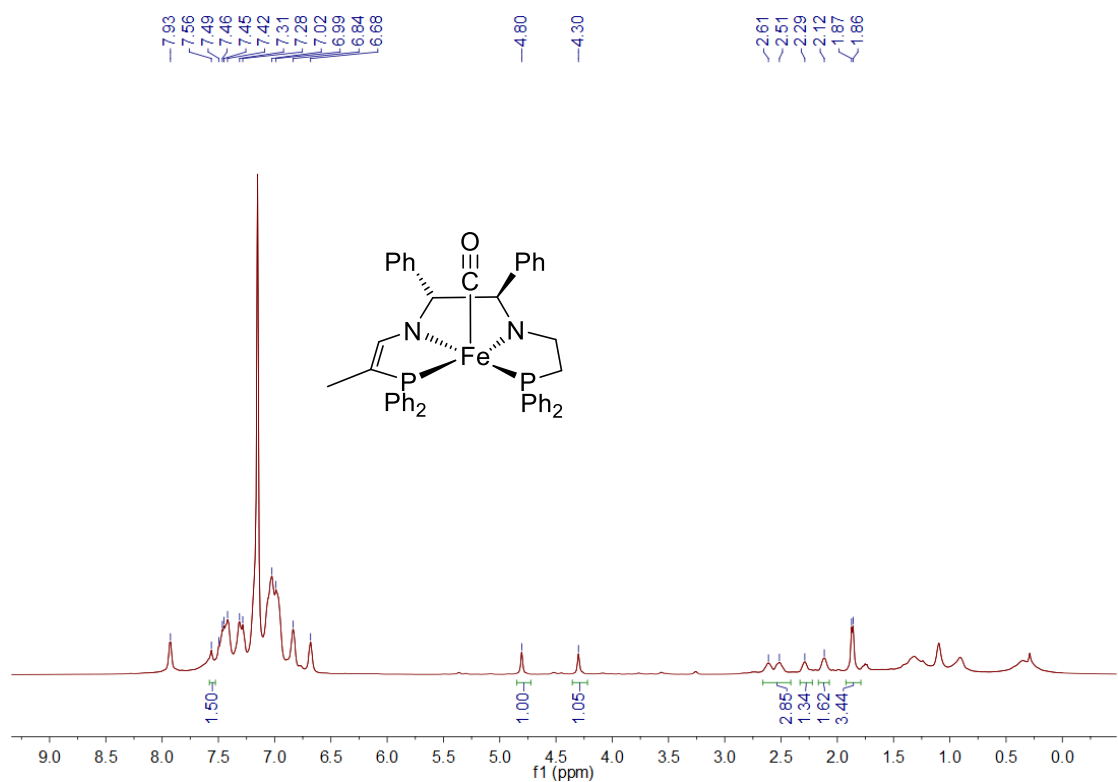

**Figure S53**  $^1\text{H}$  NMR (600 MHz,  $\text{C}_6\text{D}_6$ ) spectrum of **2a'**.



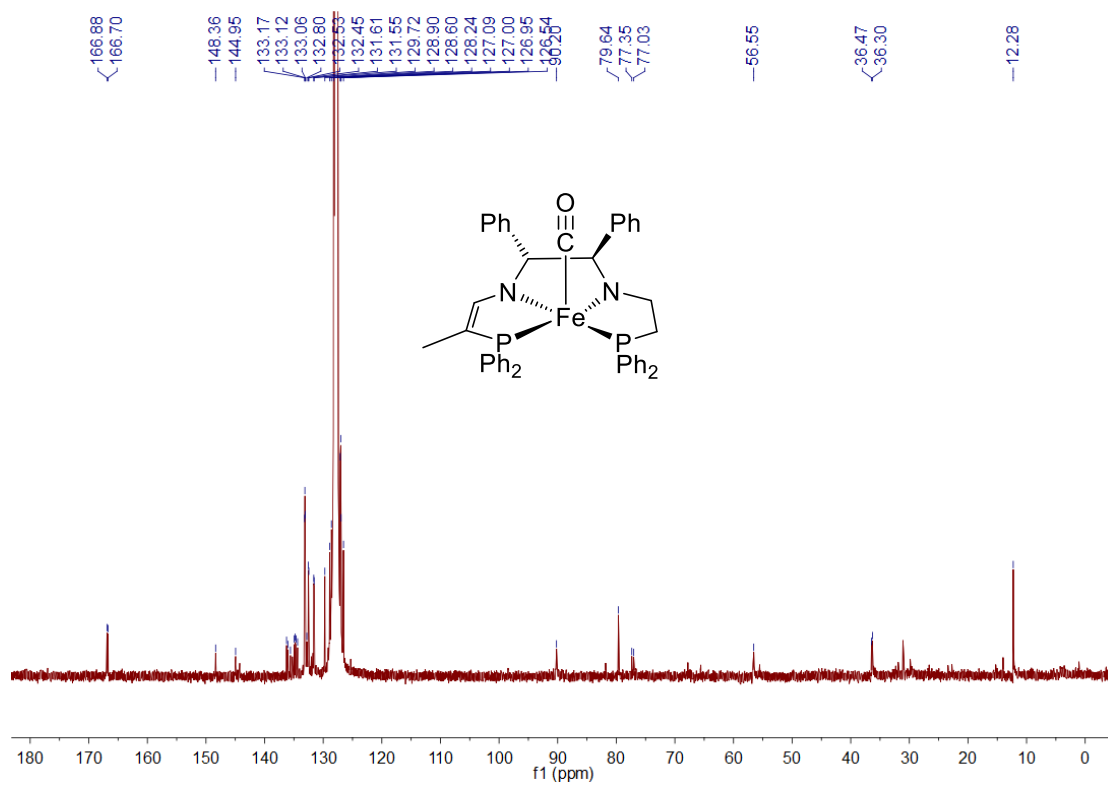

**Figure S54**  $^{13}\text{C}\{^1\text{H}\}$  NMR (151 MHz,  $\text{C}_6\text{D}_6$ ) spectrum of **2a'**.

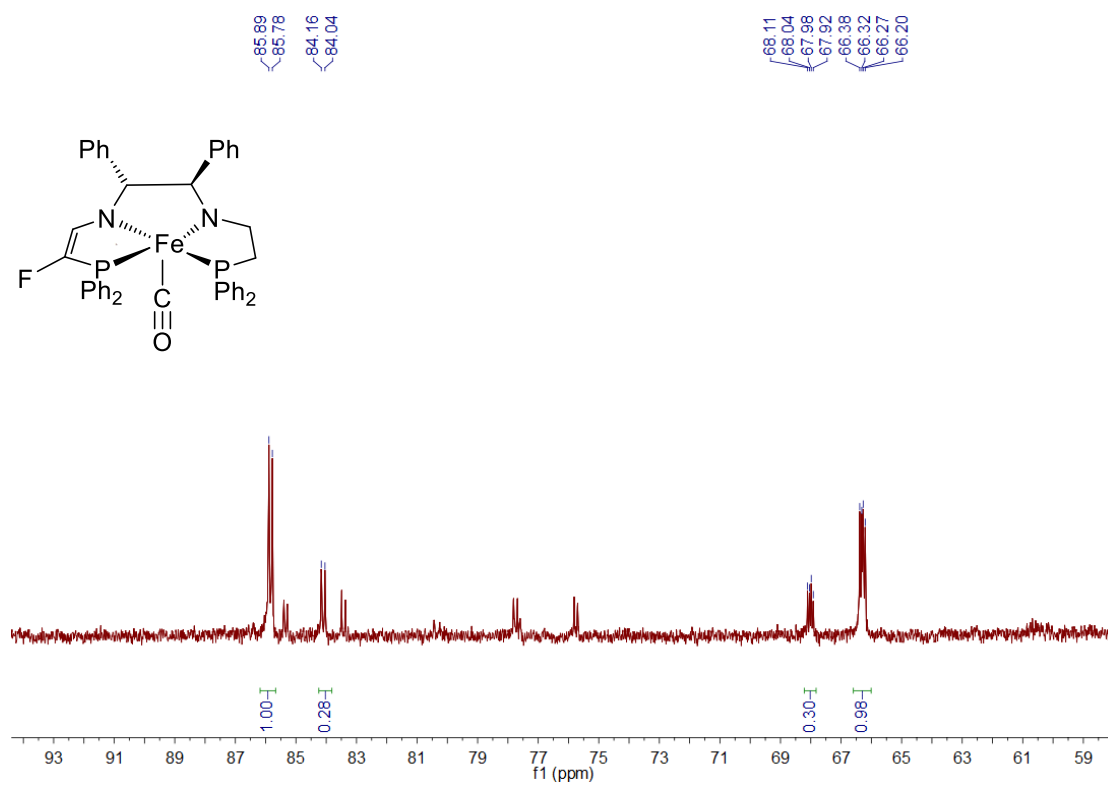

**Figure S55**  $^{31}\text{P}\{^1\text{H}\}$  NMR (243 MHz,  $\text{C}_6\text{D}_6$ ) spectrum of **3a**.

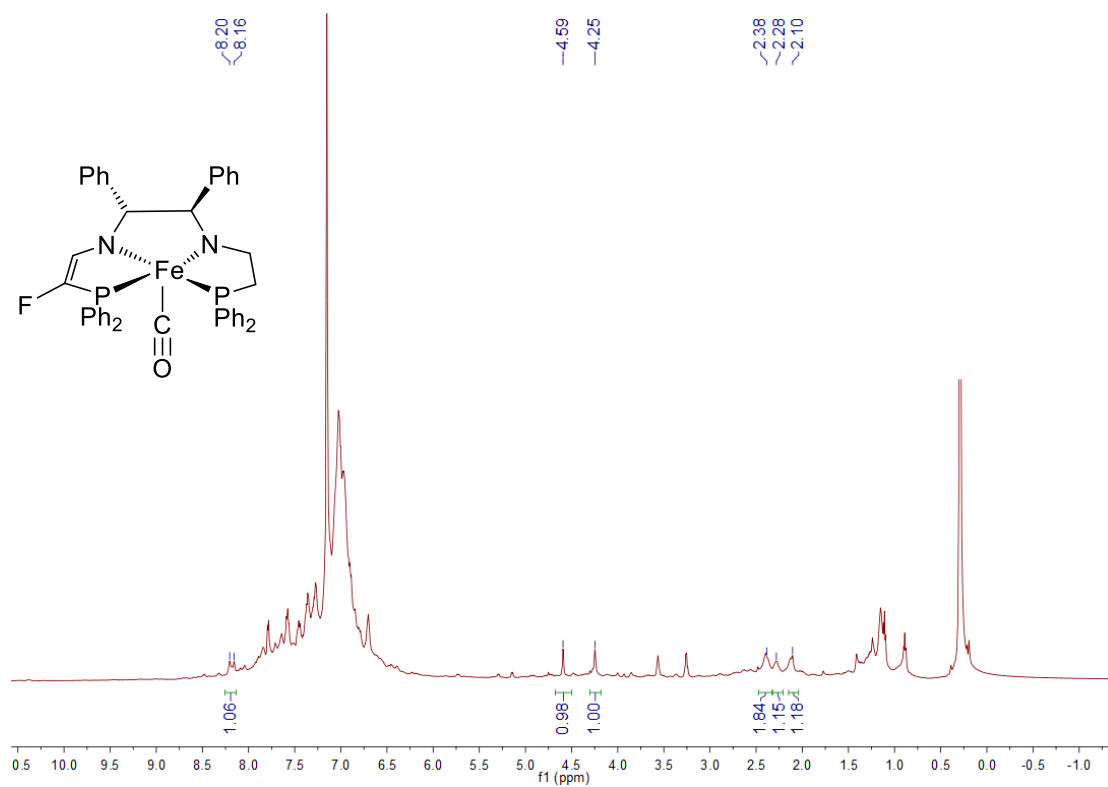

**Figure S56** <sup>1</sup>H NMR (600 MHz, C<sub>6</sub>D<sub>6</sub>) spectrum of **3a**.

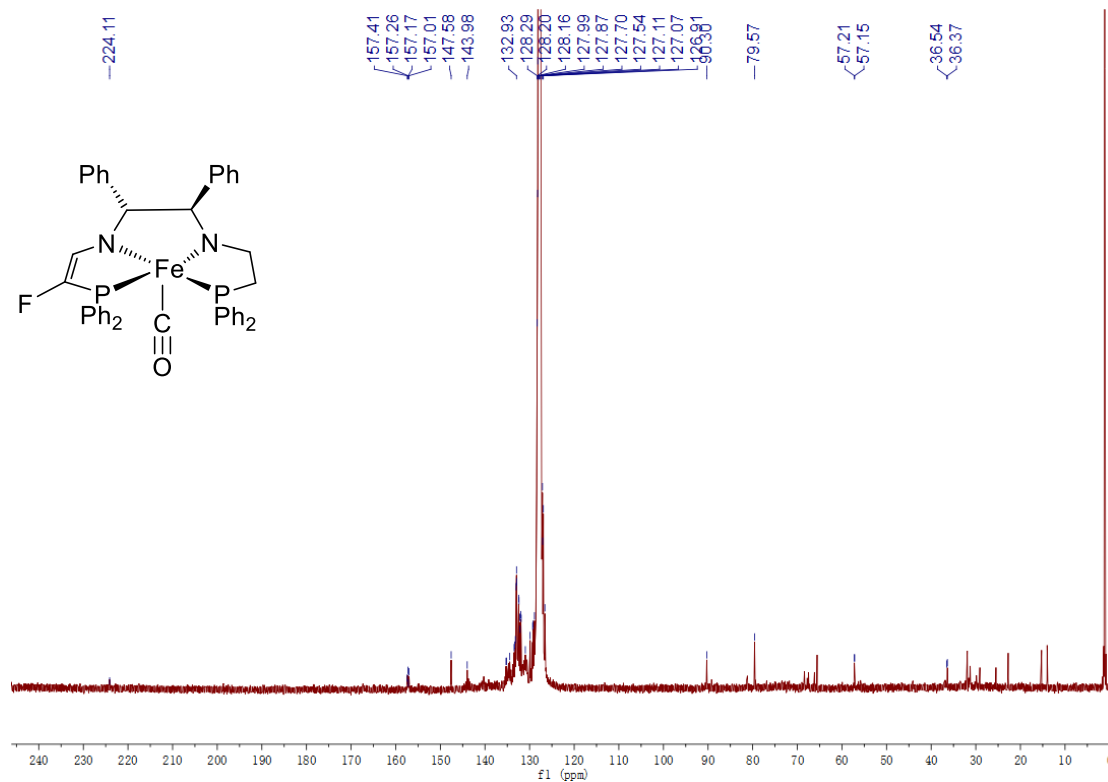

**Figure S57** <sup>13</sup>C{<sup>1</sup>H} NMR (151 MHz, C<sub>6</sub>D<sub>6</sub>) spectrum of **3a**.

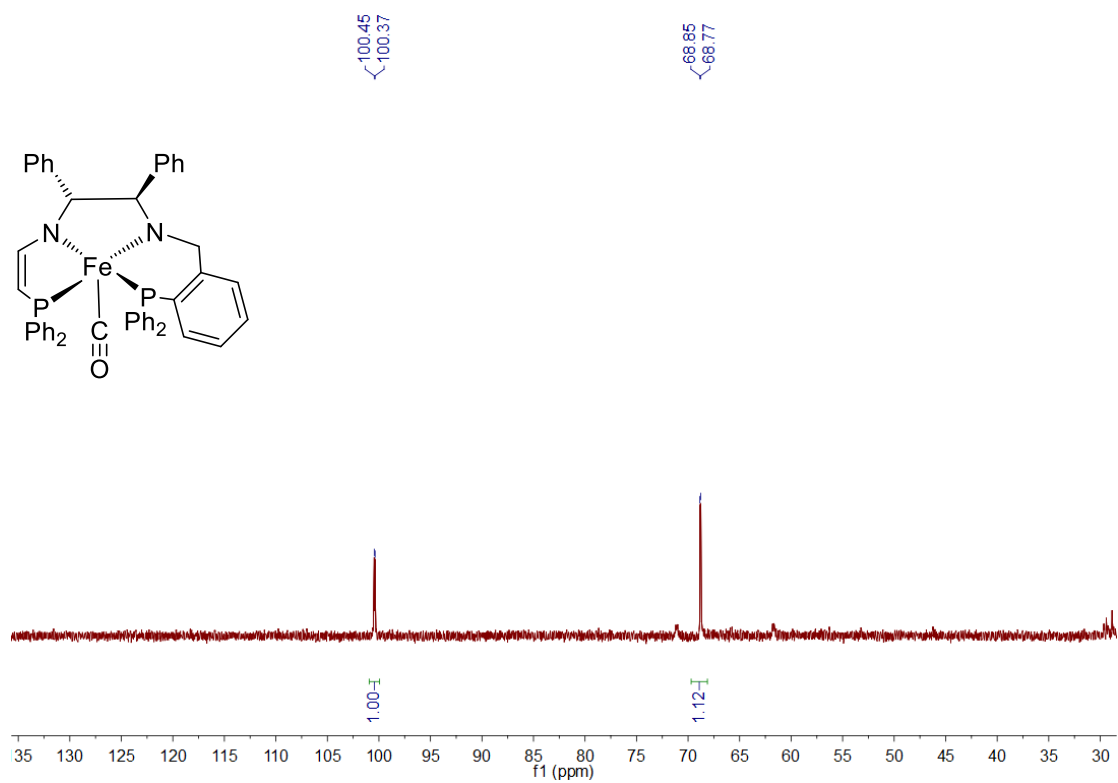

**Figure S58**  $^{31}\text{P}\{^1\text{H}\}$  NMR (243 MHz,  $\text{C}_6\text{D}_6$ ) spectrum of **4a**.

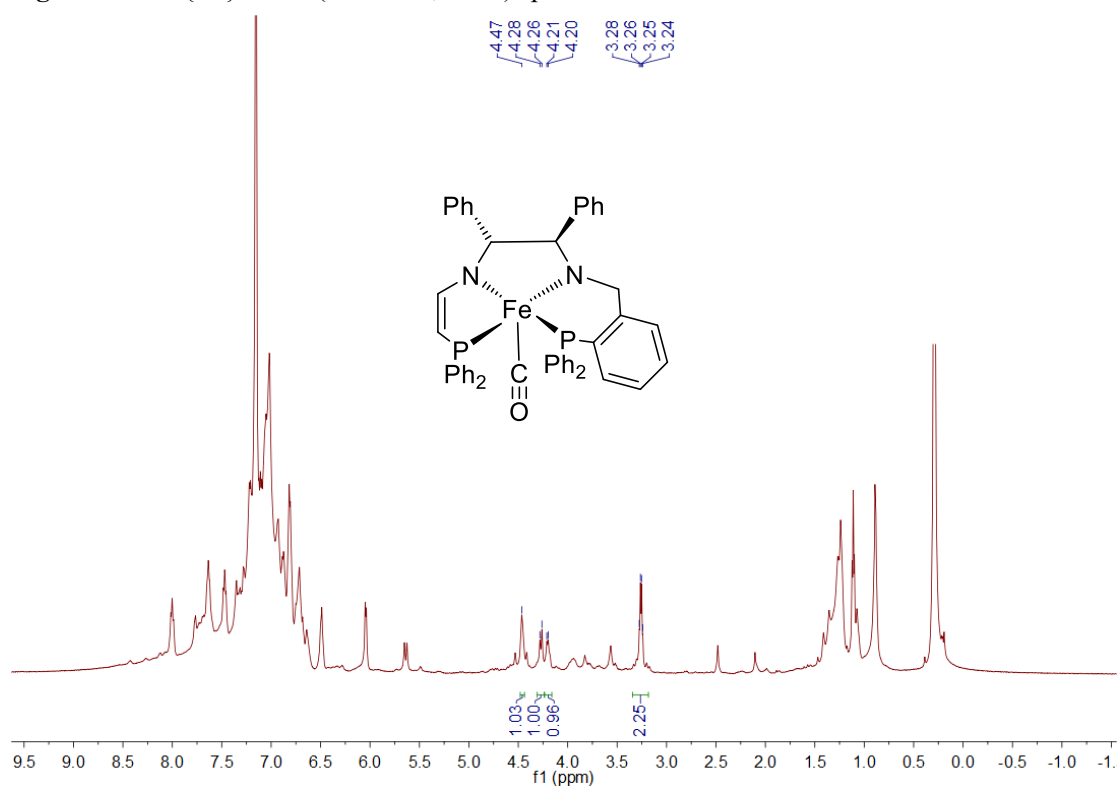

**Figure S59**  $^1\text{H}$  NMR (600 MHz,  $\text{C}_6\text{D}_6$ ) spectrum of **4a**.

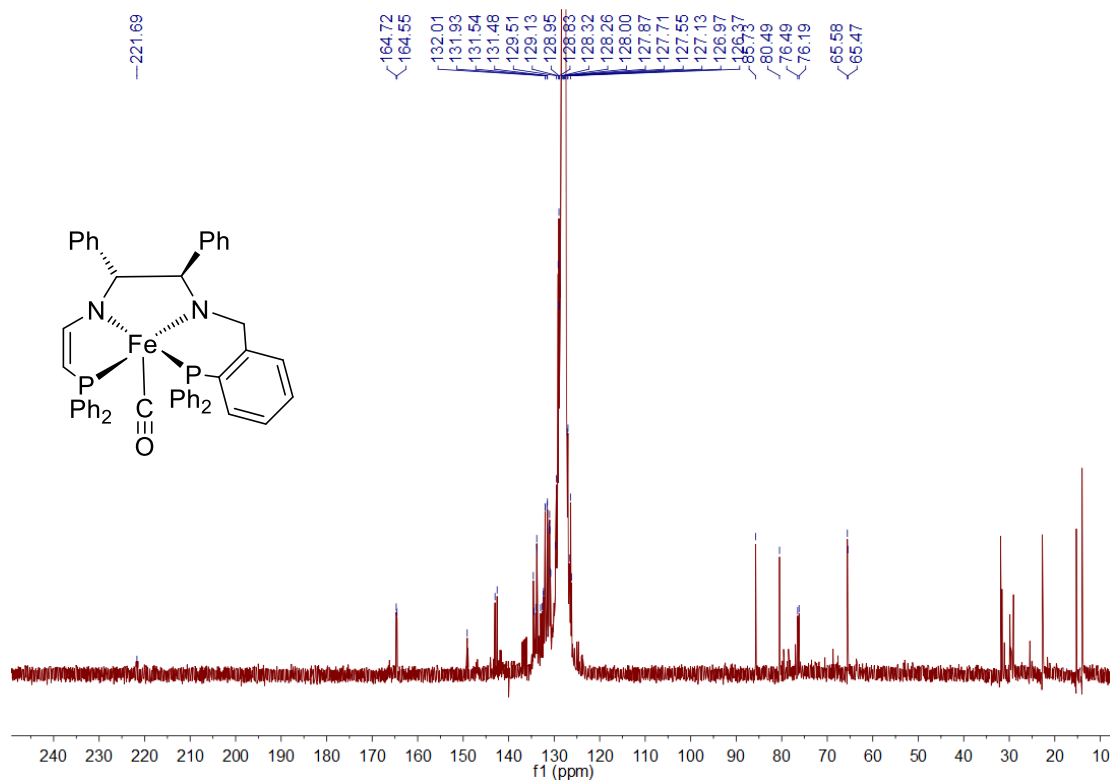

**Figure S60**  $^{13}\text{C}\{^1\text{H}\}$  NMR (151 MHz,  $\text{C}_6\text{D}_6$ ) spectrum of **4a**.

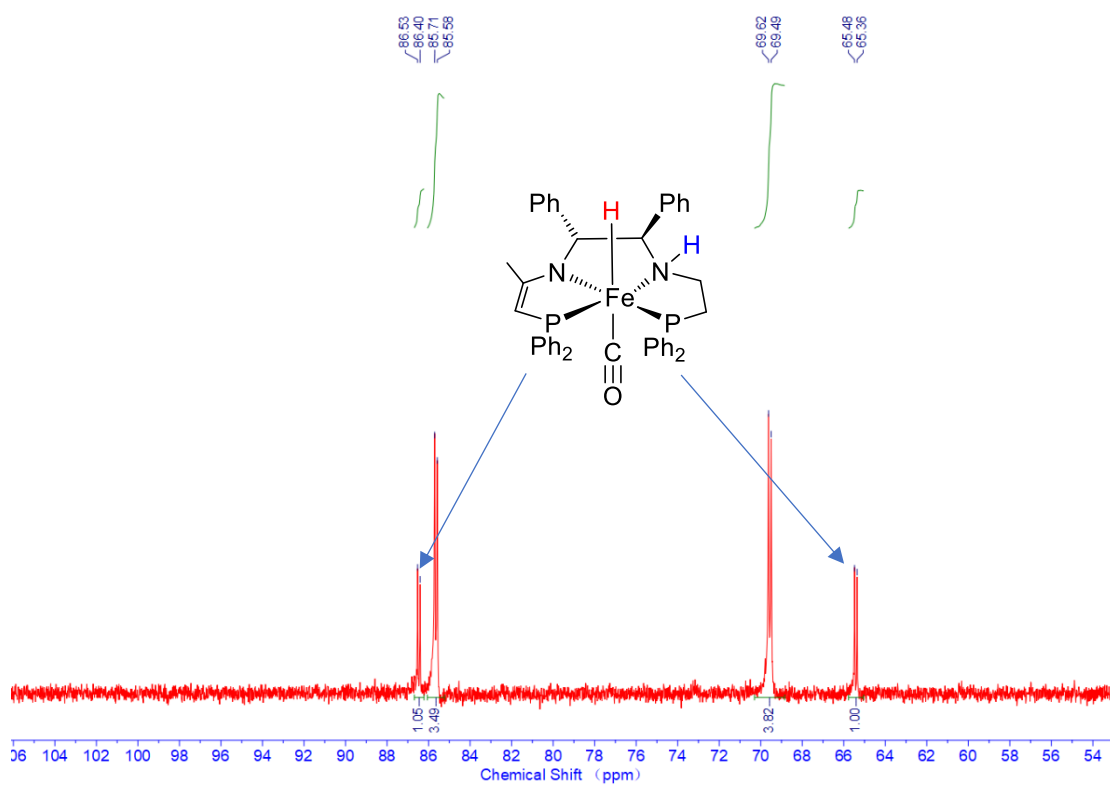

**Figure S61**  $^{31}\text{P}\{^1\text{H}\}$  NMR (243 MHz,  $\text{C}_6\text{D}_6$ ) spectrum of the mixture of **1b** with isopropanol.

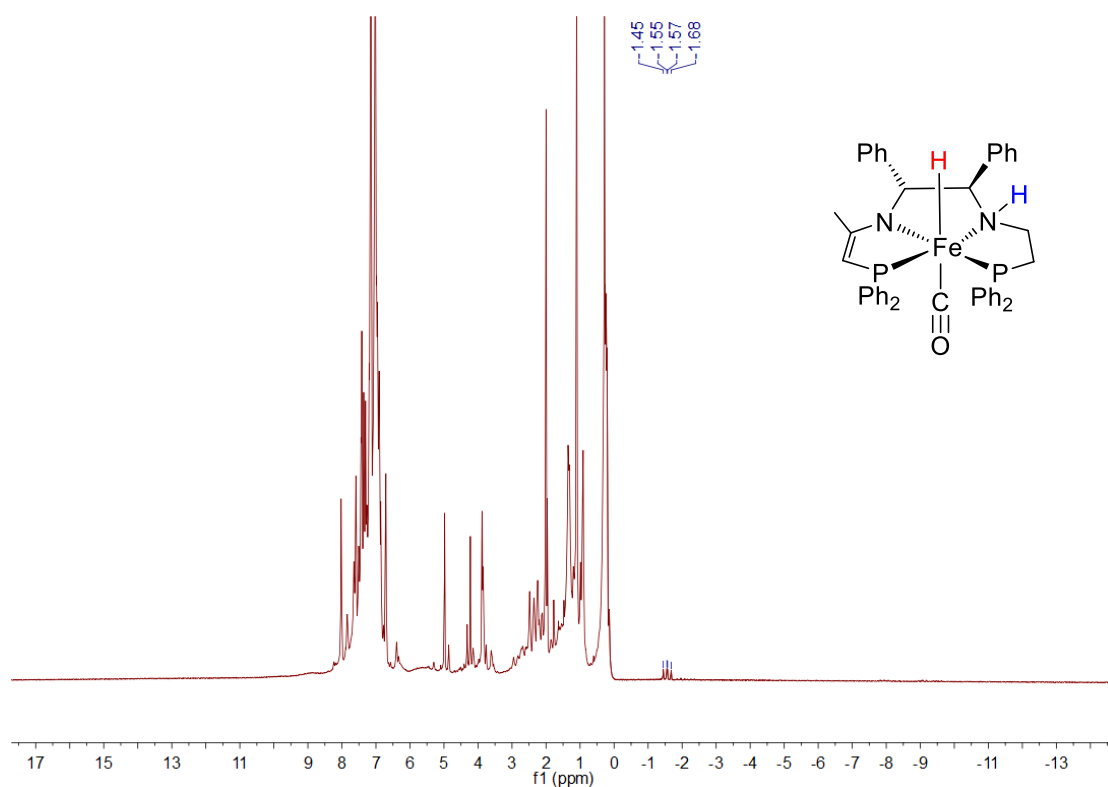

**Figure S62**  $^1\text{H}$  NMR (600 MHz,  $\text{C}_6\text{D}_6$ ) spectrum of the mixture of **1b** with isopropanol.

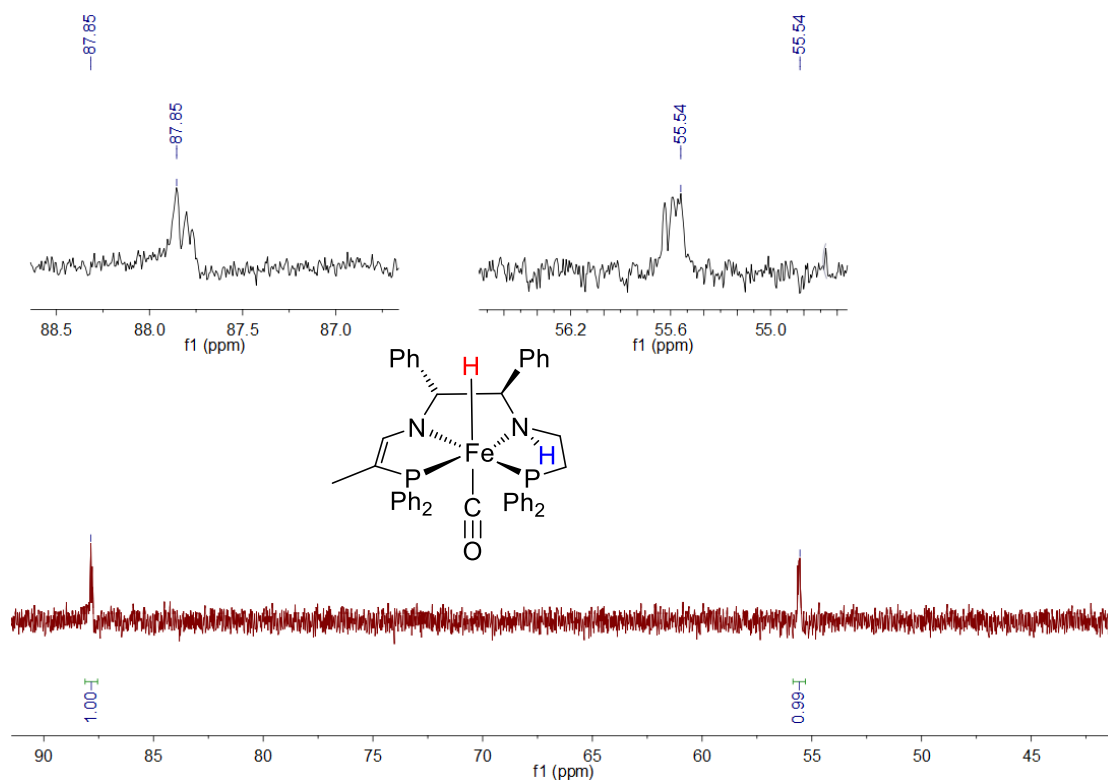

**Figure S63**  $^{31}\text{P}\{^1\text{H}\}$  NMR (243 MHz,  $\text{C}_6\text{D}_6$ ) spectrum of **2b'**.

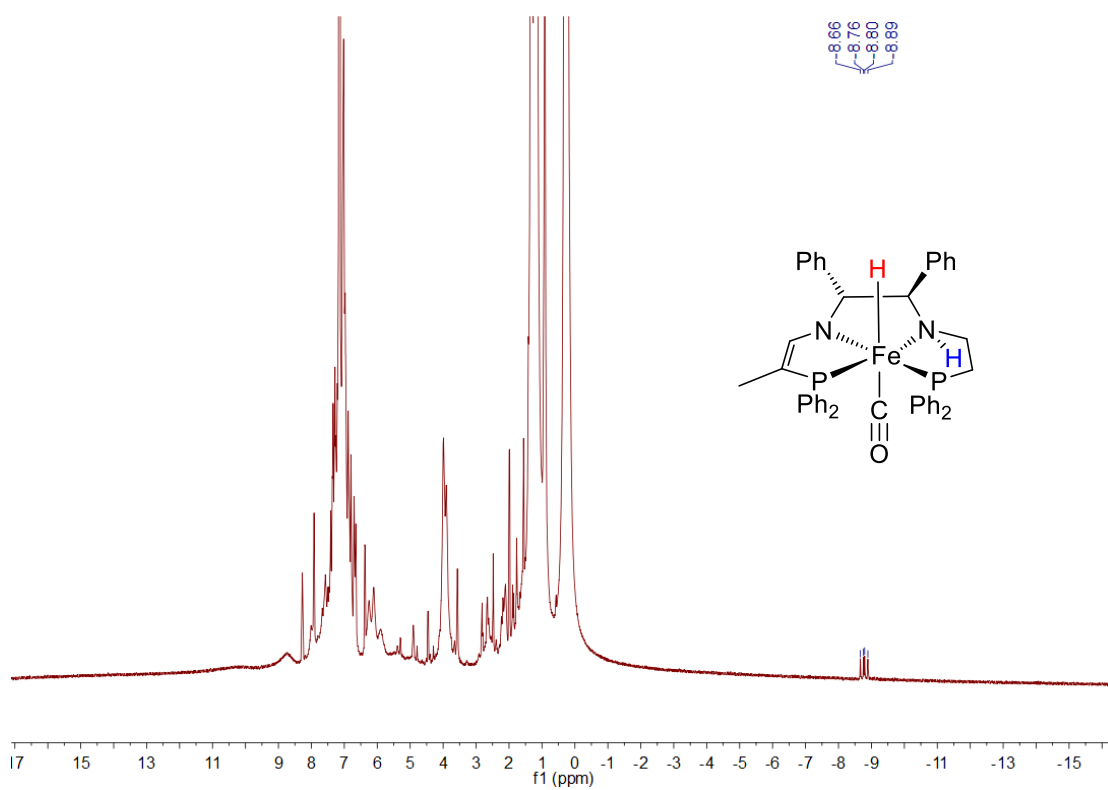

**Figure S64** <sup>1</sup>H NMR (600 MHz, C<sub>6</sub>D<sub>6</sub>) spectrum of **2b'**.

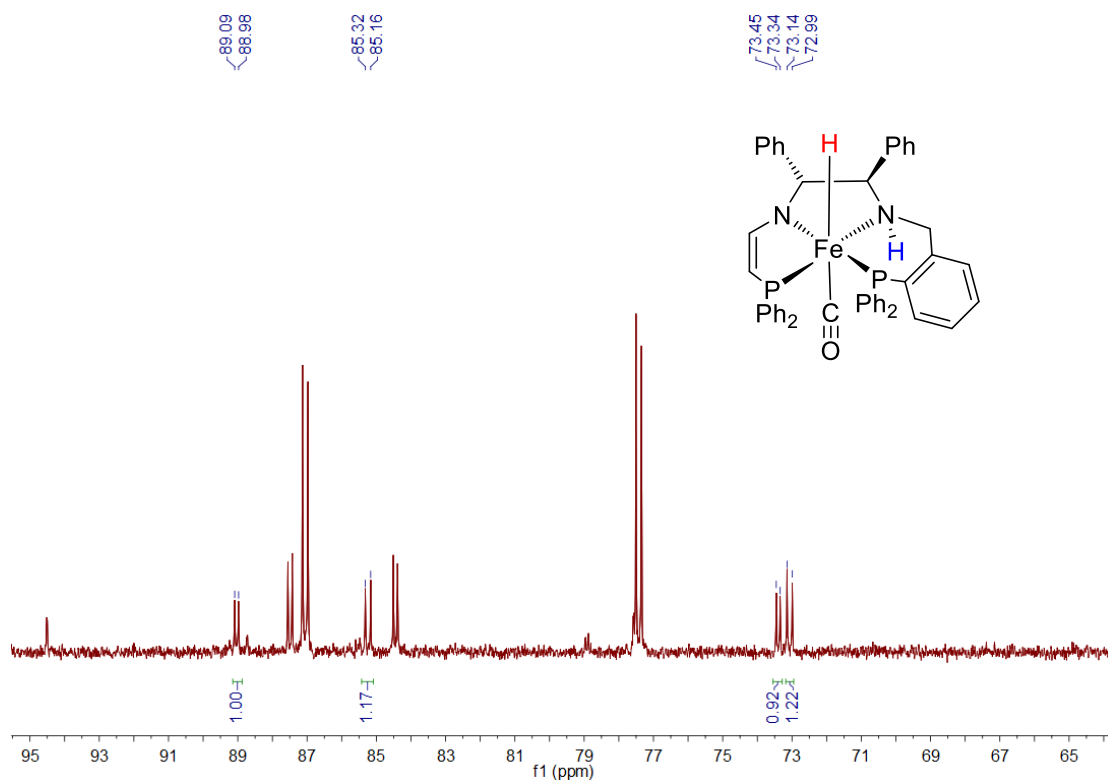

**Figure S65** <sup>31</sup>P{<sup>1</sup>H} NMR (243 MHz, C<sub>6</sub>D<sub>6</sub>) spectrum of **4b'**.

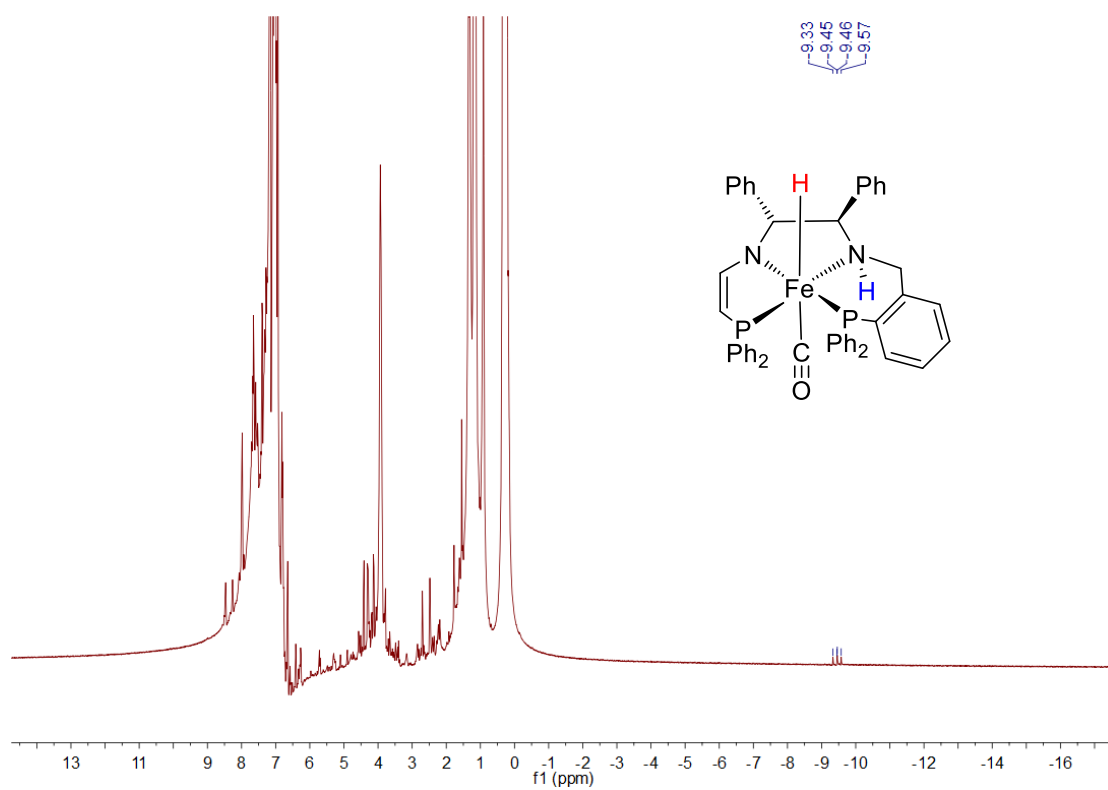

**Figure S66**  $^1\text{H}$  NMR (600 MHz,  $\text{C}_6\text{D}_6$ ) spectrum of **4b'**.
